# Supplementary material for: Association between genetically proxied glucosamine and risk of cancer and non-neoplastic disease: A Mendelian randomization study
Source: Front Genet. 2024 Jun 27;15:1293668. doi: 10.3389/fgene.2024.1293668 (PMC11236616; doi:10.3389/fgene.2024.1293668)
Supplement: Supplementary file 1 [file Table2.XLSX]

## Sheet: Sheet1
S2 Table. The features of instrumental variants that are associated with the habitual consumption of glucosamine
Chr	SNP	Position	Effect allele	Other allele	Beta	SE	pval	F-statistics
10	rs10740101	64746142	G	A	0.127	0.001	4.42e-08	56
12	rs10840899	17996887	A	G	-0.108	0.001	4.75e-08	43
10	rs1509952	64739668	T	C	0.127	0.001	3.96e-08	55
10	rs4746746	64699981	T	C	0.126	0.001	4.81e-08	58
10	rs6479846	64655471	C	A	0.126	0.001	4.87e-08	55
10	rs6479848	64659101	C	T	0.126	0.001	4.94e-08	52
10	rs6479860	64745865	T	C	0.127	0.001	4.58e-08	56
10	rs7100204	64640543	C	T	0.127	0.001	4.02e-08	50
10	rs7100320	64640594	C	T	0.129	0.001	2.91e-08	58
4	rs7665570	42152351	A	C	0.123	0.001	4.34e-08	46
S3 Table. The correlations between instrumental variants (IVs) associated with the regular consumption of glucosamine and the risk of cancer
Cancer site	Subype	SNP	Effect allele	Reference allele	OR(95%CI)	P Value
Haemangioma and lymphangioma	NA	rs10740101	G	A	0.96(0.88-1.05)	0.3549
		rs10840899	A	G	0.95(0.87-1.03)	0.1992
		rs1509952	T	C	0.96(0.88-1.04)	0.3336
		rs4746746	T	C	0.96(0.88-1.05)	0.3526
		rs6479846	C	A	0.96(0.88-1.05)	0.4038
		rs6479848	C	T	0.96(0.88-1.05)	0.3822
		rs6479860	T	C	0.96(0.88-1.05)	0.3552
		rs7100204	C	T	0.96(0.88-1.05)	0.4056
		rs7100320	C	T	0.96(0.88-1.05)	0.3936
		rs7665570	A	C	1.03(0.92-1.15)	0.592
Pan cancer	NA	rs10740101	G	A	1.00(1.00-1.00)	0.2
		rs1509952	T	C	1.00(1.00-1.00)	0.18
		rs4746746	T	C	1.00(1.00-1.00)	0.19
		rs6479846	C	A	1.00(1.00-1.00)	0.11
		rs6479848	C	T	1.00(1.00-1.00)	0.11
		rs7100320	C	T	1.00(1.00-1.00)	0.08
		rs7665570	A	C	1.00(1.00-1.00)	0.75
Bladder	Benign Neoplasm	rs10740101	G	A	1.02(0.77-1.35)	0.8984
		rs10840899	A	G	0.90(0.69-1.17)	0.4345
		rs1509952	T	C	1.00(0.76-1.34)	0.9651
		rs4746746	T	C	1.02(0.77-1.35)	0.9079
		rs6479846	C	A	0.99(0.75-1.32)	0.9598
		rs6479848	C	T	1.00(0.76-1.35)	0.9309
		rs6479860	T	C	1.02(0.77-1.35)	0.8981
		rs7100204	C	T	0.97(0.73-1.29)	0.8435
		rs7100320	C	T	0.97(0.73-1.29)	0.8388
		rs7665570	A	C	0.84(0.58-1.21)	0.3497
Bladder	Malignant Neoplasm	rs10740101	G	A	0.96(0.87-1.05)	0.379
		rs10840899	A	G	0.98(0.90-1.07)	0.702
		rs1509952	T	C	0.95(0.87-1.04)	0.2754
		rs4746746	T	C	0.96(0.87-1.05)	0.3441
		rs6479846	C	A	0.96(0.88-1.06)	0.4125
		rs6479848	C	T	0.96(0.87-1.05)	0.3799
		rs6479860	T	C	0.96(0.87-1.05)	0.3798
		rs7100204	C	T	0.97(0.88-1.06)	0.4612
		rs7100320	C	T	0.96(0.88-1.06)	0.4507
		rs7665570	A	C	0.99(0.88-1.12)	0.8693
Thyroid	Benign Neoplasm	rs10740101	G	A	1.03(0.90-1.19)	0.6404
		rs10840899	A	G	1.00(0.88-1.15)	0.8955
		rs1509952	T	C	1.04(0.90-1.20)	0.5658
		rs4746746	T	C	1.03(0.90-1.19)	0.6529
		rs6479846	C	A	1.02(0.88-1.17)	0.7948
		rs6479848	C	T	1.02(0.89-1.18)	0.762801
		rs6479860	T	C	1.03(0.90-1.19)	0.6402
		rs7100204	C	T	1.00(0.87-1.16)	0.9471
		rs7100320	C	T	1.00(0.87-1.16)	0.9572
		rs7665570	A	C	0.98(0.81-1.17)	0.788401
Thyroid	Malignant Neoplasm	rs10740101	G	A	1.00(0.90-1.10)	0.9548
		rs10840899	A	G	0.97(0.88-1.06)	0.472799
		rs1509952	T	C	1.00(0.91-1.11)	0.9659
		rs4746746	T	C	1.00(0.90-1.10)	0.9652
		rs6479846	C	A	0.99(0.90-1.10)	0.9078
		rs6479848	C	T	0.99(0.90-1.10)	0.8959
		rs6479860	T	C	1.00(0.90-1.10)	0.9559
		rs7100204	C	T	0.98(0.89-1.08)	0.7173
		rs7100320	C	T	0.98(0.89-1.08)	0.7035
		rs7665570	A	C	0.91(0.80-1.03)	0.1318
Head and neck	NA	rs10740101	G	A	0.88(0.73-1.06)	0.1888
		rs10840899	A	G	1.00(0.85-1.21)	0.8696
		rs1509952	T	C	0.87(0.73-1.05)	0.1557
		rs4746746	T	C	0.88(0.73-1.06)	0.1634
		rs6479846	C	A	0.88(0.73-1.06)	0.1793
		rs6479848	C	T	0.89(0.74-1.07)	0.207
		rs6479860	T	C	0.88(0.73-1.06)	0.1889
		rs7100204	C	T	0.88(0.73-1.06)	0.1887
		rs7100320	C	T	0.88(0.73-1.06)	0.1856
		rs7665570	A	C	0.88(0.69-1.12)	0.295
Lymphoma	Diffuse large B-cell lymphoma	rs10740101	G	A	0.93(0.75-1.15)	0.4879
		rs10840899	A	G	0.94(0.77-1.15)	0.5512
		rs1509952	T	C	0.94(0.76-1.16)	0.543599
		rs4746746	T	C	0.93(0.75-1.14)	0.4813
		rs6479846	C	A	0.92(0.75-1.14)	0.446
		rs6479848	C	T	0.92(0.74-1.13)	0.4282
		rs6479860	T	C	0.93(0.75-1.15)	0.4897
		rs7100204	C	T	0.92(0.74-1.13)	0.4258
		rs7100320	C	T	0.92(0.74-1.13)	0.4213
		rs7665570	A	C	0.94(0.72-1.23)	0.6592
Lymphoma	Follicular lymphoma	rs10740101	G	A	1.07(0.94-1.22)	0.3115
		rs10840899	A	G	1.00(0.89-1.14)	0.9455
		rs1509952	T	C	1.07(0.94-1.22)	0.3164
		rs4746746	T	C	1.07(0.94-1.22)	0.32
		rs6479846	C	A	1.08(0.95-1.23)	0.2555
		rs6479848	C	T	1.07(0.94-1.22)	0.3295
		rs6479860	T	C	1.07(0.94-1.22)	0.3113
		rs7100204	C	T	1.07(0.93-1.22)	0.3424
		rs7100320	C	T	1.07(0.93-1.22)	0.3498
		rs7665570	A	C	0.90(0.76-1.07)	0.2515
Lymphoma	Hodgkin lymphoma	rs10740101	G	A	1.00(0.85-1.17)	0.9933
		rs10840899	A	G	1.00(0.86-1.16)	0.9933
		rs1509952	T	C	1.00(0.86-1.18)	0.9086
		rs4746746	T	C	1.00(0.85-1.17)	0.989
		rs6479846	C	A	1.02(0.87-1.19)	0.814
		rs6479848	C	T	1.02(0.87-1.19)	0.8277
		rs6479860	T	C	1.00(0.85-1.17)	0.9932
		rs7100204	C	T	1.05(0.90-1.24)	0.5099
		rs7100320	C	T	1.05(0.90-1.24)	0.5184
		rs7665570	A	C	0.90(0.73-1.10)	0.3146
Lymphoma	Non-follicular lymphoma	rs10740101	G	A	1.00(0.92-1.09)	0.9372
		rs10840899	A	G	0.98(0.91-1.07)	0.6694
		rs1509952	T	C	1.00(0.92-1.09)	0.9493
		rs4746746	T	C	1.00(0.92-1.09)	0.9547
		rs6479846	C	A	1.00(0.92-1.09)	0.9172
		rs6479848	C	T	1.00(0.93-1.10)	0.8458
		rs6479860	T	C	1.00(0.92-1.09)	0.9362
		rs7100204	C	T	1.00(0.91-1.09)	0.9395
		rs7100320	C	T	1.00(0.92-1.09)	0.9586
		rs7665570	A	C	1.00(0.91-1.13)	0.8376
Lymphoma	non-Hodgkin lymphoma	rs10740101	G	A	1.05(0.92-1.19)	0.5088
		rs10840899	A	G	1.03(0.91-1.17)	0.6285
		rs1509952	T	C	1.04(0.91-1.19)	0.5452
		rs4746746	T	C	1.05(0.92-1.19)	0.5044
		rs6479846	C	A	1.06(0.93-1.21)	0.3547
		rs6479848	C	T	1.06(0.93-1.21)	0.4035
		rs6479860	T	C	1.05(0.92-1.19)	0.5085
		rs7100204	C	T	1.05(0.92-1.20)	0.4781
		rs7100320	C	T	1.05(0.92-1.20)	0.447
		rs7665570	A	C	1.03(0.87-1.22)	0.755699
Lymphoma	Mature T/NK-cell lymphomas	rs10740101	G	A	0.83(0.65-1.06)	0.1436
		rs10840899	A	G	1.08(0.85-1.36)	0.5353
		rs1509952	T	C	0.83(0.65-1.06)	0.1316
		rs4746746	T	C	0.83(0.65-1.06)	0.1423
		rs6479846	C	A	0.81(0.64-1.04)	0.1041
		rs6479848	C	T	0.81(0.64-1.04)	0.1023
		rs6479860	T	C	0.83(0.65-1.06)	0.1437
		rs7100204	C	T	0.79(0.62-1.02)	0.0677002
		rs7100320	C	T	0.79(0.62-1.02)	0.0668806
		rs7665570	A	C	0.88(0.64-1.21)	0.4386
Small intestine cancer	Benign Neoplasm	rs10740101	G	A	0.93(0.82-1.06)	0.2886
		rs10840899	A	G	1.12(0.99-1.26)	0.0752593
		rs1509952	T	C	0.93(0.82-1.06)	0.2678
		rs4746746	T	C	0.93(0.82-1.06)	0.2951
		rs6479846	C	A	0.93(0.82-1.06)	0.2652
		rs6479848	C	T	0.93(0.82-1.06)	0.2821
		rs6479860	T	C	0.93(0.82-1.06)	0.2899
		rs7100204	C	T	0.94(0.83-1.07)	0.3686
		rs7100320	C	T	0.94(0.83-1.07)	0.3635
		rs7665570	A	C	0.88(0.74-1.04)	0.1297
Small intestine cancer	Malignant Neoplasm	rs10740101	G	A	0.94(0.78-1.14)	0.5559
		rs10840899	A	G	0.86(0.72-1.03)	0.0956489
		rs1509952	T	C	0.95(0.79-1.15)	0.613901
		rs4746746	T	C	0.94(0.78-1.14)	0.5459
		rs6479846	C	A	0.94(0.78-1.14)	0.518
		rs6479848	C	T	0.94(0.77-1.13)	0.5079
		rs6479860	T	C	0.94(0.78-1.14)	0.5568
		rs7100204	C	T	0.94(0.78-1.14)	0.558799
		rs7100320	C	T	0.94(0.78-1.14)	0.5525
		rs7665570	A	C	0.97(0.76-1.24)	0.792399
Bone and articular cartilage cancer	Benign Neoplasm	rs10740101	G	A	0.92(0.84-1.00)	0.0550098
		rs10840899	A	G	1.00(0.92-1.09)	0.9758
		rs1509952	T	C	0.91(0.84-1.00)	0.0440301
		rs4746746	T	C	0.92(0.84-1.00)	0.05297
		rs6479846	C	A	0.92(0.84-1.00)	0.0614497
		rs6479848	C	T	0.92(0.84-1.00)	0.0632397
		rs6479860	T	C	0.92(0.84-1.00)	0.0551201
		rs7100204	C	T	0.93(0.85-1.02)	0.1085
		rs7100320	C	T	0.93(0.85-1.02)	0.1042
		rs7665570	A	C	1.07(0.95-1.20)	0.273
Bone and articular cartilage	Malignant Neoplasm	rs10740101	G	A	0.85(0.65-1.13)	0.2651
		rs10840899	A	G	0.87(0.67-1.13)	0.2928
		rs1509952	T	C	0.86(0.66-1.14)	0.295
		rs4746746	T	C	0.86(0.65-1.13)	0.2738
		rs6479846	C	A	0.84(0.63-1.10)	0.2058
		rs6479848	C	T	0.84(0.63-1.10)	0.2023
		rs6479860	T	C	0.85(0.65-1.13)	0.2651
		rs7100204	C	T	0.85(0.64-1.12)	0.2452
		rs7100320	C	T	0.85(0.64-1.12)	0.2425
		rs7665570	A	C	0.87(0.61-1.24)	0.4396
Eye and adnexa	Benign Neoplasm	rs10740101	G	A	1.00(0.92-1.09)	0.9992
		rs10840899	A	G	1.00(0.93-1.10)	0.739301
		rs1509952	T	C	1.00(0.91-1.09)	0.9254
		rs4746746	T	C	1.00(0.92-1.09)	0.9677
		rs6479846	C	A	0.99(0.91-1.09)	0.9043
		rs6479848	C	T	0.99(0.91-1.08)	0.8666
		rs6479860	T	C	1.00(0.92-1.09)	0.9998
		rs7100204	C	T	1.00(0.92-1.09)	0.9709
		rs7100320	C	T	1.00(0.92-1.10)	0.9513
		rs7665570	A	C	1.03(0.92-1.15)	0.6446
Eye and adnexa	Malignant Neoplasm	rs10740101	G	A	1.15(0.90-1.45)	0.2617
		rs10840899	A	G	1.00(0.80-1.25)	0.9741
		rs1509952	T	C	1.15(0.91-1.46)	0.2353
		rs4746746	T	C	1.14(0.90-1.45)	0.2648
		rs6479846	C	A	1.16(0.92-1.47)	0.2105
		rs6479848	C	T	1.16(0.92-1.47)	0.2142
		rs6479860	T	C	1.15(0.90-1.45)	0.2615
		rs7100204	C	T	1.17(0.92-1.49)	0.1919
		rs7100320	C	T	1.17(0.92-1.49)	0.1943
		rs7665570	A	C	0.84(0.62-1.15)	0.278
Larynx	Benign Neoplasm	rs10740101	G	A	1.08(0.93-1.25)	0.3333
		rs10840899	A	G	0.91(0.79-1.05)	0.2059
		rs1509952	T	C	1.08(0.93-1.25)	0.3203
		rs4746746	T	C	1.08(0.93-1.25)	0.3376
		rs6479846	C	A	1.08(0.93-1.25)	0.3316
		rs6479848	C	T	1.08(0.93-1.25)	0.34
		rs6479860	T	C	1.08(0.93-1.25)	0.3324
		rs7100204	C	T	1.08(0.93-1.26)	0.3238
		rs7100320	C	T	1.08(0.93-1.25)	0.3292
		rs7665570	A	C	1.28(1.06-1.56)	0.0125101
Larynx	Malignant Neoplasm	rs10740101	G	A	0.96(0.76-1.20)	0.702
		rs10840899	A	G	0.90(0.73-1.12)	0.347
		rs1509952	T	C	0.96(0.77-1.21)	0.742699
		rs4746746	T	C	0.96(0.77-1.20)	0.7345
		rs6479846	C	A	0.96(0.76-1.20)	0.6902
		rs6479848	C	T	0.95(0.76-1.20)	0.686099
		rs6479860	T	C	0.96(0.76-1.20)	0.702301
		rs7100204	C	T	0.96(0.76-1.20)	0.710699
		rs7100320	C	T	0.96(0.76-1.20)	0.706
		rs7665570	A	C	1.28(0.95-1.71)	0.1032
Pancreas	Benign Neoplasm	rs10740101	G	A	0.69(0.55-0.88)	0.00223702
		rs10840899	A	G	1.25(1.00-1.57)	0.0471205
		rs1509952	T	C	0.69(0.54-0.87)	0.00189898
		rs4746746	T	C	0.7(0.55-0.89)	0.003173
		rs6479846	C	A	0.69(0.54-0.87)	0.001945
		rs6479848	C	T	0.69(0.54-0.87)	0.00185601
		rs6479860	T	C	0.69(0.55-0.88)	0.00224202
		rs7100204	C	T	0.69(0.54-0.87)	0.001996
		rs7100320	C	T	0.69(0.54-0.87)	0.00196101
		rs7665570	A	C	1.26(0.92-1.71)	0.1439
Pancreas	Malignant Neoplasm	rs10740101	G	A	0.94(0.83-1.07)	0.3418
		rs10840899	A	G	1.03(0.92-1.16)	0.623
		rs1509952	T	C	0.95(0.84-1.07)	0.4147
		rs4746746	T	C	0.94(0.83-1.06)	0.3317
		rs6479846	C	A	0.94(0.83-1.07)	0.3393
		rs6479848	C	T	0.94(0.83-1.07)	0.3439
		rs6479860	T	C	0.94(0.83-1.07)	0.3418
		rs7100204	C	T	0.96(0.85-1.08)	0.498101
		rs7100320	C	T	0.96(0.85-1.08)	0.4899
		rs7665570	A	C	1.08(0.92-1.27)	0.3676
Oesophagus	Benign Neoplasm	rs10740101	G	A	0.88(0.69-1.13)	0.3094
		rs10840899	A	G	1.00(0.79-1.27)	0.9935
		rs1509952	T	C	0.89(0.69-1.14)	0.343
		rs4746746	T	C	0.88(0.69-1.13)	0.3174
		rs6479846	C	A	0.88(0.68-1.12)	0.2961
		rs6479848	C	T	0.87(0.68-1.12)	0.2851
		rs6479860	T	C	0.88(0.69-1.13)	0.3095
		rs7100204	C	T	0.87(0.68-1.11)	0.267
		rs7100320	C	T	0.87(0.68-1.11)	0.2638
		rs7665570	A	C	1.07(0.77-1.48)	0.673301
Oesophagus	Malignant Neoplasm	rs10740101	G	A	1.08(0.89-1.32)	0.434
		rs10840899	A	G	1.06(0.88-1.28)	0.541
		rs1509952	T	C	1.09(0.90-1.33)	0.3817
		rs4746746	T	C	1.08(0.89-1.32)	0.432
		rs6479846	C	A	1.09(0.89-1.33)	0.4118
		rs6479848	C	T	1.09(0.89-1.33)	0.4189
		rs6479860	T	C	1.08(0.89-1.32)	0.4338
		rs7100204	C	T	1.08(0.88-1.32)	0.4698
		rs7100320	C	T	1.08(0.88-1.31)	0.475501
		rs7665570	A	C	1.03(0.79-1.33)	0.8455
Stomach	Benign Neoplasm	rs10740101	G	A	1.04(0.95-1.13)	0.3959
		rs10840899	A	G	1.02(0.94-1.10)	0.7105
		rs1509952	T	C	1.04(0.95-1.13)	0.4071
		rs4746746	T	C	1.04(0.95-1.13)	0.4213
		rs6479846	C	A	1.04(0.95-1.13)	0.3727
		rs6479848	C	T	1.04(0.96-1.13)	0.3543
		rs6479860	T	C	1.04(0.95-1.13)	0.3958
		rs7100204	C	T	1.03(0.95-1.12)	0.4799
		rs7100320	C	T	1.03(0.95-1.13)	0.4639
		rs7665570	A	C	0.98(0.88-1.10)	0.730999
Stomach	Malignant Neoplasm	rs10740101	G	A	1.00(0.89-1.13)	0.9874
		rs10840899	A	G	1.07(0.95-1.20)	0.2483
		rs1509952	T	C	1.00(0.89-1.13)	0.9285
		rs4746746	T	C	1.00(0.88-1.13)	0.9757
		rs6479846	C	A	1.00(0.88-1.12)	0.9425
		rs6479848	C	T	0.99(0.88-1.12)	0.8843
		rs6479860	T	C	1.00(0.89-1.13)	0.9875
		rs7100204	C	T	0.98(0.87-1.11)	0.7964
		rs7100320	C	T	0.98(0.87-1.11)	0.7878
		rs7665570	A	C	1.00(0.85-1.16)	0.9545
Liver/bile ducts	Benign Neoplasm	rs10740101	G	A	1.12(0.93-1.35)	0.2315
		rs10840899	A	G	1.02(0.86-1.22)	0.7878
		rs1509952	T	C	1.11(0.92-1.33)	0.2756
		rs4746746	T	C	1.12(0.93-1.35)	0.2334
		rs6479846	C	A	1.13(0.93-1.36)	0.211
		rs6479848	C	T	1.11(0.93-1.34)	0.2543
		rs6479860	T	C	1.12(0.93-1.35)	0.2314
		rs7100204	C	T	1.13(0.94-1.36)	0.1998
		rs7100320	C	T	1.13(0.94-1.36)	0.2028
		rs7665570	A	C	1.00(0.79-1.29)	0.9389
Liver/bile ducts	Malignant Neoplasm	rs10740101	G	A	0.97(0.82-1.16)	0.7493
		rs10840899	A	G	1.13(0.96-1.33)	0.1355
		rs1509952	T	C	0.96(0.81-1.14)	0.622499
		rs4746746	T	C	0.98(0.82-1.16)	0.7828
		rs6479846	C	A	0.97(0.82-1.16)	0.7554
		rs6479848	C	T	0.97(0.82-1.16)	0.752501
		rs6479860	T	C	0.97(0.82-1.16)	0.7489
		rs7100204	C	T	0.99(0.83-1.17)	0.8662
		rs7100320	C	T	0.98(0.83-1.17)	0.8585
		rs7665570	A	C	1.15(0.92-1.44)	0.2264
Ovarian	NA	rs10740101	G	A	0.99(0.96-1.02)	0.402
		rs1509952	T	C	0.99(0.96-1.02)	0.3468
		rs4746746	T	C	0.99(0.96-1.02)	0.3526
		rs6479846	C	A	0.98(0.95-1.01)	0.2795
		rs6479848	C	T	0.98(0.95-1.01)	0.2783
		rs6479860	T	C	0.99(0.96-1.02)	0.3993
		rs7100204	C	T	0.98(0.95-1.01)	0.2493
		rs7100320	C	T	0.98(0.95-1.01)	0.2431
		rs7665570	A	C	1.00(0.97-1.05)	0.696101
Ovarian	Clear cell	rs10740101	G	A	0.93(0.85-1.02)	0.1064
		rs1509952	T	C	0.93(0.85-1.02)	0.1072
		rs4746746	T	C	0.93(0.85-1.02)	0.1191
		rs6479846	C	A	0.93(0.84-1.01)	0.0929801
		rs6479848	C	T	0.92(0.84-1.01)	0.0923889
		rs6479860	T	C	0.93(0.85-1.02)	0.1214
		rs7100204	C	T	0.92(0.84-1.01)	0.08569
		rs7100320	C	T	0.92(0.84-1.01)	0.0787698
		rs7665570	A	C	0.97(0.87-1.09)	0.643899
Ovarian	Endometrioid	rs10740101	G	A	0.95(0.89-1.01)	0.1037
		rs1509952	T	C	0.95(0.89-1.01)	0.0962698
		rs4746746	T	C	0.95(0.89-1.01)	0.0905107
		rs6479846	C	A	0.94(0.88-1.01)	0.0831591
		rs6479848	C	T	0.94(0.88-1.01)	0.0831994
		rs6479860	T	C	0.95(0.89-1.01)	0.1022
		rs7100204	C	T	0.95(0.89-1.01)	0.1031
		rs7100320	C	T	0.95(0.89-1.01)	0.1043
		rs7665570	A	C	0.94(0.86-1.02)	0.1346
Ovarian	Serous	rs10740101	G	A	0.99(0.96-1.03)	0.6348
		rs1509952	T	C	0.99(0.95-1.02)	0.5322
		rs4746746	T	C	0.99(0.96-1.02)	0.559899
		rs6479846	C	A	0.99(0.95-1.02)	0.4784
		rs6479848	C	T	0.99(0.95-1.02)	0.4779
		rs6479860	T	C	0.99(0.96-1.03)	0.625
		rs7100204	C	T	0.99(0.95-1.02)	0.4354
		rs7100320	C	T	0.99(0.95-1.02)	0.4251
		rs7665570	A	C	1.00(0.97-1.06)	0.5345
Skin cancer	Non-melanoma	rs10740101	G	A	1.02(0.98-1.05)	0.312
		rs10840899	A	G	1.00(0.98-1.05)	0.4215
		rs1509952	T	C	1.00(0.98-1.05)	0.426
		rs4746746	T	C	1.02(0.98-1.05)	0.3162
		rs6479846	C	A	1.02(0.98-1.05)	0.3658
		rs6479848	C	T	1.00(0.98-1.05)	0.405
		rs6479860	T	C	1.02(0.98-1.05)	0.3096
		rs7100204	C	T	1.00(0.98-1.05)	0.4567
		rs7100320	C	T	1.00(0.98-1.05)	0.480799
		rs7665570	A	C	1.02(0.98-1.06)	0.4092
Skin cancer	Melanoma	rs10740101	G	A	1.08(0.93-1.26)	0.3136
		rs10840899	A	G	1.09(0.94-1.26)	0.2569
		rs1509952	T	C	1.07(0.92-1.25)	0.3713
		rs4746746	T	C	1.09(0.94-1.27)	0.2685
		rs6479846	C	A	1.10(0.94-1.28)	0.2452
		rs6479848	C	T	1.10(0.94-1.28)	0.2252
		rs6479860	T	C	1.08(0.93-1.26)	0.3133
		rs7100204	C	T	1.10(0.94-1.28)	0.2307
		rs7100320	C	T	1.10(0.94-1.28)	0.2356
		rs7665570	A	C	1.09(0.89-1.33)	0.3931
Prostate	Benign Neoplasm	rs10740101	G	A	1.10(0.81-1.48)	0.5407
		rs10840899	A	G	0.97(0.74-1.29)	0.851
		rs1509952	T	C	1.06(0.79-1.42)	0.7077
		rs4746746	T	C	1.10(0.81-1.48)	0.5441
		rs6479846	C	A	1.10(0.82-1.48)	0.5242
		rs6479848	C	T	1.10(0.82-1.48)	0.5278
		rs6479860	T	C	1.10(0.81-1.48)	0.5405
		rs7100204	C	T	1.05(0.78-1.42)	0.734999
		rs7100320	C	T	1.07(0.80-1.45)	0.6383
		rs7665570	A	C	1.15(0.79-1.67)	0.4787
Prostate	Malignant Neoplasm	rs10740101	G	A	1.03(0.99-1.08)	0.1576
		rs10840899	A	G	1.02(0.98-1.07)	0.3025
		rs1509952	T	C	1.03(0.98-1.08)	0.2177
		rs4746746	T	C	1.03(0.99-1.08)	0.1556
		rs6479846	C	A	1.03(0.98-1.08)	0.1997
		rs6479848	C	T	1.03(0.99-1.08)	0.186
		rs6479860	T	C	1.03(0.99-1.08)	0.1569
		rs7100204	C	T	1.03(0.99-1.08)	0.1817
		rs7100320	C	T	1.03(0.99-1.08)	0.1616
		rs7665570	A	C	1.08(1.01-1.14)	0.0143599
Colon	Adenocarcinoma	rs10740101	G	A	0.98(0.90-1.07)	0.641599
		rs10840899	A	G	1.02(0.94-1.10)	0.6388
		rs1509952	T	C	0.98(0.90-1.07)	0.663901
		rs4746746	T	C	0.98(0.90-1.06)	0.6284
		rs6479846	C	A	0.98(0.90-1.07)	0.6593
		rs6479848	C	T	0.99(0.91-1.07)	0.7465
		rs6479860	T	C	0.98(0.90-1.07)	0.6426
		rs7100204	C	T	0.98(0.90-1.06)	0.6079
		rs7100320	C	T	0.98(0.90-1.06)	0.5956
		rs7665570	A	C	0.94(0.84-1.04)	0.2275
Colon	Ascending	rs10740101	G	A	0.94(0.86-1.02)	0.1422
		rs10840899	A	G	0.97(0.89-1.05)	0.4304
		rs1509952	T	C	0.93(0.86-1.02)	0.114
		rs4746746	T	C	0.94(0.86-1.02)	0.1365
		rs6479846	C	A	0.95(0.87-1.03)	0.2014
		rs6479848	C	T	0.94(0.86-1.03)	0.1742
		rs6479860	T	C	0.94(0.86-1.02)	0.1428
		rs7100204	C	T	0.93(0.85-1.01)	0.0851491
		rs7100320	C	T	0.93(0.85-1.01)	0.0963008
		rs7665570	A	C	1.04(0.93-1.16)	0.5317
Colon	Descending	rs10740101	G	A	0.94(0.83-1.06)	0.2868
		rs10840899	A	G	1.00(0.90-1.13)	0.9163
		rs1509952	T	C	0.93(0.83-1.05)	0.2449
		rs4746746	T	C	0.94(0.83-1.05)	0.2802
		rs6479846	C	A	0.94(0.83-1.05)	0.2671
		rs6479848	C	T	0.93(0.83-1.05)	0.2301
		rs6479860	T	C	0.94(0.83-1.06)	0.2867
		rs7100204	C	T	0.93(0.82-1.04)	0.2136
		rs7100320	C	T	0.93(0.83-1.05)	0.2491
		rs7665570	A	C	0.91(0.78-1.06)	0.23
Colon	Sigmoid	rs10740101	G	A	1.05(0.98-1.12)	0.1725
		rs10840899	A	G	1.00(0.94-1.07)	0.9538
		rs1509952	T	C	1.05(0.98-1.12)	0.1691
		rs4746746	T	C	1.05(0.98-1.12)	0.1756
		rs6479846	C	A	1.04(0.97-1.11)	0.2912
		rs6479848	C	T	1.03(0.97-1.10)	0.3246
		rs6479860	T	C	1.05(0.98-1.12)	0.1717
		rs7100204	C	T	1.03(0.96-1.10)	0.3835
		rs7100320	C	T	1.03(0.97-1.10)	0.3478
		rs7665570	A	C	1.00(0.92-1.10)	0.8502
Colon	Transverse	rs10740101	G	A	1.03(0.93-1.13)	0.579599
		rs10840899	A	G	0.98(0.90-1.08)	0.723099
		rs1509952	T	C	1.02(0.93-1.13)	0.6522
		rs4746746	T	C	1.03(0.93-1.13)	0.5641
		rs6479846	C	A	1.03(0.93-1.13)	0.56
		rs6479848	C	T	1.03(0.93-1.13)	0.584901
		rs6479860	T	C	1.03(0.93-1.13)	0.578901
		rs7100204	C	T	1.04(0.94-1.15)	0.4316
		rs7100320	C	T	1.04(0.94-1.15)	0.4404
		rs7665570	A	C	0.94(0.83-1.07)	0.3225
Colon	Benign Neoplasm	rs10740101	G	A	0.94(0.89-1.00)	0.0370903
		rs10840899	A	G	0.99(0.94-1.04)	0.6659
		rs1509952	T	C	0.95(0.90-1.00)	0.0442099
		rs4746746	T	C	0.95(0.90-1.00)	0.0405901
		rs6479846	C	A	0.95(0.90-1.00)	0.0512495
		rs6479848	C	T	0.95(0.90-1.00)	0.0444396
		rs6479860	T	C	0.94(0.89-1.00)	0.0351504
		rs7100204	C	T	0.96(0.90-1.01)	0.0983807
		rs7100320	C	T	0.96(0.91-1.01)	0.1026
		rs7665570	A	C	0.98(0.91-1.05)	0.5369
Colon	Malignant Neoplasm	rs10740101	G	A	0.99(0.92-1.07)	0.8062
		rs10840899	A	G	0.99(0.93-1.06)	0.8449
		rs1509952	T	C	0.99(0.92-1.06)	0.756599
		rs4746746	T	C	0.99(0.92-1.06)	0.788
		rs6479846	C	A	0.99(0.92-1.07)	0.8562
		rs6479848	C	T	1.00(0.93-1.07)	0.9271
		rs6479860	T	C	0.99(0.92-1.07)	0.8088
		rs7100204	C	T	0.99(0.92-1.07)	0.8276
		rs7100320	C	T	0.99(0.92-1.07)	0.8116
		rs7665570	A	C	1.00(0.91-1.10)	0.9763
Lung	Squamous cell carcinoma	rs10740101	G	A	0.97(0.91-1.03)	0.28653
		rs10840899	A	G	0.98(0.93-1.04)	0.528141
		rs1509952	T	C	0.96(0.90-1.03)	0.243565
		rs4746746	T	C	0.96(0.90-1.03)	0.243602
		rs6479846	C	A	0.96(0.90-1.02)	0.156677
		rs6479848	C	T	0.96(0.90-1.02)	0.161899
		rs6479860	T	C	0.97(0.91-1.03)	0.27612
		rs7100204	C	T	0.96(0.90-1.03)	0.257598
		rs7100320	C	T	0.96(0.90-1.03)	0.257422
		rs7665570	A	C	1.02(0.94-1.10)	0.67613
Lung	Adenocarcinoma	rs10740101	G	A	1.00(0.95-1.07)	0.797272
		rs10840899	A	G	0.97(0.92-1.02)	0.277156
		rs1509952	T	C	1.00(0.95-1.07)	0.775136
		rs4746746	T	C	1.00(0.95-1.07)	0.796017
		rs6479846	C	A	1.00(0.94-1.06)	0.971909
		rs6479848	C	T	1.00(0.94-1.06)	0.998949
		rs6479860	T	C	1.00(0.95-1.07)	0.762688
		rs7100204	C	T	1.00(0.94-1.07)	0.956523
		rs7100320	C	T	1.00(0.94-1.07)	0.944729
		rs7665570	A	C	1.07(0.99-1.16)	0.0928966
Breast	NA	rs10740101	G	A	1.00(0.98-1.01)	0.8797
		rs1509952	T	C	1.00(0.99-1.01)	0.9142
		rs4746746	T	C	1.00(0.98-1.01)	0.8807
		rs6479846	C	A	0.99(0.98-1.01)	0.4745
		rs6479848	C	T	0.99(0.98-1.01)	0.4716
		rs6479860	T	C	1.00(0.99-1.01)	0.8915
		rs7100204	C	T	0.99(0.98-1.01)	0.4041
		rs7100320	C	T	0.99(0.98-1.01)	0.4194
		rs7665570	A	C	1.00(0.98-1.02)	0.753101
Breast	ER+	rs10740101	G	A	0.99(0.98-1.01)	0.3613
		rs1509952	T	C	0.99(0.98-1.01)	0.3858
		rs4746746	T	C	0.99(0.98-1.01)	0.3611
		rs6479846	C	A	0.99(0.97-1.00)	0.166
		rs6479848	C	T	0.99(0.97-1.00)	0.164
		rs6479860	T	C	0.99(0.98-1.01)	0.357
		rs7100204	C	T	0.99(0.97-1.00)	0.1108
		rs7100320	C	T	0.99(0.97-1.00)	0.1186
		rs7665570	A	C	1.00(0.98-1.02)	0.7951
Breast	ER-	rs10740101	G	A	1.00(0.98-1.03)	0.7258
		rs1509952	T	C	1.00(0.98-1.03)	0.7198
		rs4746746	T	C	1.00(0.98-1.03)	0.6618
		rs6479846	C	A	1.00(0.98-1.03)	0.767201
		rs6479848	C	T	1.00(0.98-1.03)	0.7633
		rs6479860	T	C	1.00(0.98-1.03)	0.693999
		rs7100204	C	T	1.00(0.98-1.03)	0.8244
		rs7100320	C	T	1.00(0.98-1.03)	0.8249
		rs7665570	A	C	1.00(0.97-1.03)	0.9727
S4 Table. The correlations between instrumental variants (IVs) associated with the regular consumption of glucosamine and the risk of non-neoplastic disease
Disease	SNP	Effect allele	Reference allele	OR(95%CI)	P Value
Parkinson's disease	rs10740101	G	A	0.99(0.94-1.05)	0.7757
	rs1509952	T	C	0.99(0.95-1.05)	0.8401
	rs4746746	T	C	0.98(0.94-1.03)	0.4983
	rs6479846	C	A	0.98(0.94-1.03)	0.4213
	rs6479848	C	T	0.98(0.94-1.03)	0.4206
	rs7100320	C	T	0.98(0.94-1.03)	0.4469
	rs7665570	A	C	0.96(0.91-1.02)	0.1816
Alzheimer's disease	rs10740101	G	A	0.99(0.96-1.03)	0.7199
	rs1509952	T	C	1.00(0.96-1.03)	0.8348
	rs4746746	T	C	1.00(0.96-1.03)	0.8524
	rs6479846	C	A	0.99(0.96-1.02)	0.5637
	rs6479848	C	T	0.99(0.96-1.02)	0.5706
	rs7100320	C	T	0.99(0.96-1.02)	0.510199
	rs7665570	A	C	1.00(0.96-1.05)	0.83
Amyotrophic lateral sclerosis	rs10740101	G	A	1.00(1.00-1.01)	0.096801
	rs10840899	A	G	1.00(0.99-1.01)	0.995275
	rs1509952	T	C	1.00(1.00-1.01)	0.0898918
	rs4746746	T	C	1.00(1.00-1.01)	0.127533
	rs6479846	C	A	1.00(1.00-1.01)	0.17174
	rs6479848	C	T	1.00(1.00-1.01)	0.171121
	rs6479860	T	C	1.00(1.00-1.01)	0.0977597
	rs7100204	C	T	1.00(1.00-1.01)	0.20086
	rs7100320	C	T	1.00(1.00-1.01)	0.197176
	rs7665570	A	C	1.00(1.00-1.02)	0.2454
Bipolar disorder	rs10740101	G	A	1.02(0.99-1.05)	0.1466
	rs1509952	T	C	1.02(0.99-1.05)	0.1537
	rs4746746	T	C	1.02(0.99-1.05)	0.1588
	rs6479846	C	A	1.02(0.99-1.06)	0.1301
	rs6479848	C	T	1.02(0.99-1.06)	0.1279
	rs7100320	C	T	1.02(0.99-1.05)	0.1565
	rs7665570	A	C	0.98(0.94-1.01)	0.2314
Anorexia nervosa	rs10740101	G	A	0.96(0.90-1.03)	0.2433
	rs10840899	A	G	0.99(0.93-1.04)	0.6329
	rs1509952	T	C	0.97(0.90-1.03)	0.2899
	rs4746746	T	C	0.96(0.90-1.02)	0.2175
	rs6479846	C	A	0.96(0.90-1.02)	0.1806
	rs6479848	C	T	0.96(0.90-1.02)	0.1818
	rs6479860	T	C	0.96(0.90-1.03)	0.2231
	rs7100204	C	T	0.96(0.90-1.02)	0.2062
	rs7100320	C	T	0.96(0.90-1.02)	0.218
	rs7665570	A	C	0.96(0.88-1.04)	0.3176
Autism spectrum disorder	rs10740101	G	A	0.98(0.95-1.01)	0.1901
	rs10840899	A	G	0.99(0.96-1.02)	0.3902
	rs1509952	T	C	0.98(0.95-1.01)	0.1959
	rs4746746	T	C	0.98(0.95-1.01)	0.1765
	rs6479846	C	A	0.97(0.94-1.01)	0.1031
	rs6479848	C	T	0.97(0.94-1.01)	0.1047
	rs6479860	T	C	0.98(0.95-1.01)	0.2114
	rs7100204	C	T	0.97(0.94-1.01)	0.1144
	rs7100320	C	T	0.97(0.94-1.01)	0.112
	rs7665570	A	C	0.94(0.90-0.98)	0.00155901
Major depressive disorder	rs10740101	G	A	1.00(1.00-1.00)	0.211422
	rs10840899	A	G	1.00(1.00-1.00)	0.375077
	rs1509952	T	C	1.00(1.00-1.00)	0.214961
	rs4746746	T	C	1.00(1.00-1.00)	0.180863
	rs6479846	C	A	1.00(1.00-1.00)	0.103529
	rs6479848	C	T	1.00(1.00-1.00)	0.0994489
	rs6479860	T	C	1.00(1.00-1.00)	0.212799
	rs7100204	C	T	1.00(1.00-1.00)	0.0963607
	rs7100320	C	T	1.00(1.00-1.00)	0.100397
	rs7665570	A	C	1.00(1.00-1.00)	0.826826
Multiple sclerosis	rs10740101	G	A	0.95(0.92-0.99)	0.01034
	rs1509952	T	C	0.95(0.92-0.99)	0.0130101
	rs4746746	T	C	0.95(0.92-0.99)	0.00751796
	rs6479846	C	A	0.96(0.93-1.00)	0.0336403
	rs6479848	C	T	0.96(0.93-1.00)	0.0397704
	rs7100320	C	T	0.96(0.92-1.00)	0.0316701
	rs7665570	A	C	1.00(0.96-1.06)	0.7202
Atopic dermatitis	rs10740101	G	A	1.03(0.99-1.08)	0.1448
	rs10840899	A	G	0.98(0.94-1.02)	0.3677
	rs1509952	T	C	1.03(0.99-1.08)	0.179
	rs4746746	T	C	1.03(0.99-1.08)	0.1519
	rs6479846	C	A	1.03(0.99-1.08)	0.1322
	rs6479848	C	T	1.03(0.99-1.08)	0.1511
	rs6479860	T	C	1.03(0.99-1.08)	0.1446
	rs7100204	C	T	1.03(0.99-1.08)	0.1569
	rs7100320	C	T	1.03(0.99-1.08)	0.144
	rs7665570	A	C	0.96(0.91-1.02)	0.2103
Autoimmune thyroiditis	rs10740101	G	A	1.15(0.95-1.4)	0.1533
	rs10840899	A	G	1.09(0.91-1.31)	0.3569
	rs1509952	T	C	1.16(0.96-1.41)	0.1304
	rs4746746	T	C	1.15(0.95-1.4)	0.1554
	rs6479846	C	A	1.15(0.94-1.39)	0.1692
	rs6479848	C	T	1.15(0.94-1.39)	0.1729
	rs6479860	T	C	1.15(0.95-1.4)	0.1537
	rs7100204	C	T	1.13(0.93-1.38)	0.2137
	rs7100320	C	T	1.13(0.93-1.38)	0.217
	rs7665570	A	C	1.11(0.86-1.43)	0.4096
Chronic sinusitis	rs10740101	G	A	1.03(1.00-1.07)	0.08284
	rs10840899	A	G	0.99(0.96-1.03)	0.6506
	rs1509952	T	C	1.03(1.00-1.07)	0.0663407
	rs4746746	T	C	1.03(1.00-1.07)	0.0781502
	rs6479846	C	A	1.03(1.00-1.07)	0.06346
	rs6479848	C	T	1.03(1.00-1.07)	0.0630798
	rs6479860	T	C	1.03(1.00-1.07)	0.0826609
	rs7100204	C	T	1.04(1.00-1.07)	0.0443404
	rs7100320	C	T	1.04(1.00-1.07)	0.0413304
	rs7665570	A	C	1.03(0.99-1.08)	0.1604
Asthma	rs10740101	G	A	1.03(1.00-1.05)	0.0351803
	rs10840899	A	G	1.00(0.97-1.02)	0.7999
	rs1509952	T	C	1.03(1.00-1.05)	0.03065
	rs4746746	T	C	1.03(1.00-1.05)	0.0371099
	rs6479846	C	A	1.02(1.00-1.05)	0.0558895
	rs6479848	C	T	1.02(1.00-1.05)	0.0552803
	rs6479860	T	C	1.03(1.00-1.05)	0.0349004
	rs7100204	C	T	1.03(1.00-1.05)	0.04343
	rs7100320	C	T	1.03(1.00-1.05)	0.0385603
	rs7665570	A	C	1.00(0.97-1.04)	0.714801
Interstitial lung disease	rs10740101	G	A	0.92(0.86-0.99)	0.0210601
	rs10840899	A	G	1.00(0.93-1.06)	0.8882
	rs1509952	T	C	0.92(0.86-0.99)	0.0220298
	rs4746746	T	C	0.92(0.86-0.99)	0.0252703
	rs6479846	C	A	0.92(0.86-0.99)	0.0185102
	rs6479848	C	T	0.92(0.86-0.99)	0.0182701
	rs6479860	T	C	0.92(0.86-0.99)	0.02108
	rs7100204	C	T	0.92(0.86-0.99)	0.0223198
	rs7100320	C	T	0.92(0.86-0.99)	0.0208401
	rs7665570	A	C	0.98(0.89-1.07)	0.6048
Inflammatory Bowel Disease	rs10740101	G	A	0.96(0.92-1.00)	0.0351698
	rs10840899	A	G	1.00(0.96-1.04)	0.9337
	rs1509952	T	C	0.96(0.92-1.00)	0.0506396
	rs4746746	T	C	0.96(0.92-1.00)	0.0377703
	rs6479846	C	A	0.96(0.92-1.00)	0.0429705
	rs6479848	C	T	0.96(0.92-1.00)	0.04302
	rs6479860	T	C	0.96(0.92-1.00)	0.0352201
	rs7100204	C	T	0.96(0.92-1.00)	0.05611
	rs7100320	C	T	0.96(0.92-1.00)	0.0534995
	rs7665570	A	C	0.96(0.91-1.01)	0.1504
Gastroesophageal Reflux Disease	rs10740101	G	A	0.99(0.96-1.02)	0.507
	rs10840899	A	G	0.99(0.96-1.01)	0.3767
	rs1509952	T	C	0.99(0.96-1.02)	0.4793
	rs4746746	T	C	0.99(0.96-1.02)	0.5062
	rs6479846	C	A	0.99(0.96-1.02)	0.4402
	rs6479848	C	T	0.99(0.96-1.02)	0.4448
	rs6479860	T	C	0.99(0.96-1.02)	0.5096
	rs7100204	C	T	0.99(0.96-1.02)	0.4075
	rs7100320	C	T	0.99(0.96-1.02)	0.4097
	rs7665570	A	C	0.96(0.92-0.99)	0.02169
Type 1 diabetes	rs10740101	G	A	0.96(0.91-1.00)	0.0480496
	rs10840899	A	G	1.00(0.96-1.04)	0.9083
	rs1509952	T	C	0.96(0.92-1.00)	0.0655602
	rs4746746	T	C	0.96(0.91-1.00)	0.04741
	rs6479846	C	A	0.96(0.92-1.00)	0.0747705
	rs6479848	C	T	0.96(0.92-1.01)	0.0831094
	rs6479860	T	C	0.96(0.91-1.00)	0.0482003
	rs7100204	C	T	0.96(0.92-1.01)	0.0855008
	rs7100320	C	T	0.96(0.92-1.00)	0.0793195
	rs7665570	A	C	0.99(0.94-1.05)	0.839
Bronchiectasis	rs10840899	A	G	1.06(0.97-1.16)	0.1911
	rs7100320	C	T	0.95(0.87-1.04)	0.303
	rs7665570	A	C	0.95(0.84-1.07)	0.3859
Idiopathic pulmonary fibrosis	rs10840899	A	G	0.99(0.90-1.08)	0.8161
	rs7100320	C	T	0.90(0.82-1.00)	0.0393704
	rs7665570	A	C	0.94(0.83-1.07)	0.359
Depression	rs10840899	A	G	0.98(0.96-1.00)	0.0814404
	rs7100320	C	T	1.02(1.00-1.05)	0.0735394
	rs7665570	A	C	0.99(0.96-1.02)	0.4378
Mood disorders	rs10840899	A	G	0.98(0.96-1.00)	0.03491
	rs7100320	C	T	1.02(1.00-1.04)	0.0998895
	rs7665570	A	C	0.99(0.97-1.02)	0.685001
Type 2 diabetes	rs10740101	G	A	0.98(0.96-1.01)	0.1624
	rs10840899	A	G	1.01(0.99-1.03)	0.3306
	rs1509952	T	C	0.99(0.96-1.01)	0.2093
	rs4746746	T	C	0.98(0.96-1.01)	0.152
	rs6479846	C	A	0.98(0.96-1.01)	0.1663
	rs6479848	C	T	0.99(0.96-1.01)	0.1851
	rs6479860	T	C	0.98(0.96-1.01)	0.1646
	rs7100204	C	T	0.98(0.96-1.01)	0.1334
	rs7100320	C	T	0.98(0.96-1.01)	0.143
	rs7665570	A	C	0.99(0.97-1.02)	0.6698
Autoimmune hyperthyroidism	rs10840899	A	G	0.92(0.83-1.00)	0.0626196
	rs7100320	C	T	1.07(0.97-1.18)	0.1689
	rs7665570	A	C	1.08(0.95-1.23)	0.2303
Heart failure	rs10840899	A	G	1.00(0.98-1.02)	0.9784
	rs7100320	C	T	0.99(0.97-1.02)	0.6709
	rs7665570	A	C	0.98(0.95-1.01)	0.1179
S5 Table. Sensitivity analyses that were conducted to assess the association between genetically regular use of glucosamine and the risk of cancer
Cancer	Cancer type	Sensitivity analyses	OR(95%CI)	Pintercept
Haemangioma and lymphangioma	NA	IVW	0.81(0.65-1.02)	NA
		MR Egger	0.01(0.00-0.69)	0.076
		Weighted median	0.74(0.56-0.97)	NA
Pan cancer	NA	IVW	0.99(0.99-1.00)	NA
		MR Egger	0.75(0.48-1.18)	0.282
		Weighted median	0.99(0.98-1)	NA
Bladder	Benign Neoplasm	IVW	1.00(0.48-2.09)	NA
		MR Egger	0.01(0.00-1.65*104)	0.511
		Weighted median	1.08(0.45-2.61)	NA
Bladder	Malignant Neoplasm	IVW	0.76(0.60-0.97）	NA
		MR Egger	0.05(0.00-6.29)	0.297
		Weighted median	0.72(0.55-0.96)	NA
Corpus uteri	NA	IVW	2.68(1.23-5.86)	NA
		MR Egger	2.06*105(0.02-1.74*1012)	0.204
		Weighted median	3.35(1.22-9.19)	NA
Thyroid	Benign Neoplasm	IVW	1.15(0.80-1.66)	NA
		MR Egger	5.46(0.00-9.84*103)	0.694
		Weighted median	1.18(0.76-1.84)	NA
Thyroid	Malignant Neoplasm	IVW	0.94(0.73-1.20)	NA
		MR Egger	0.14(0.00-25.02)	0.493
		Weighted median	0.97(0.71-1.32)	NA
Head and neck	Benign Neoplasm	IVW	0.39(0.24-0.64)	NA
		MR Egger	0.00(0.00-60.79)	0.365
		Weighted median	0.37(0.21-0.67)	NA
Lymphoma	Diffuse large B-cell lymphoma	IVW	0.60.00(0.35-1.03)	NA
		MR Egger	0.00(0.00-48.63)	0.27
		Weighted median	0.55(0.28-1.08)	NA
Lymphoma	Follicular lymphoma	IVW	1.50(1.06-2.11)	NA
		MR Egger	59.63(0.05-6.63*104)	0.333
		Weighted median	1.7(1.13-2.56)	NA
Lymphoma	Hodgkin lymphoma	IVW	1.08(0.72-1.63)	NA
		MR Egger	4.77(0.00-2.09*104)	0.737
		Weighted median	1.06(0.64-1.77)	NA
Lymphoma	Non-follicular lymphoma	IVW	1.04(0.83-1.29)	NA
		MR Egger	0.43(0.00-39.03)	0.71
		Weighted median	1.03(0.79-1.34)	NA
Lymphoma	non-Hodgkin lymphoma	IVW	1.37(0.98-1.92)	NA
		MR Egger	61.04(0.06-6.35*104)	0.315
		Weighted median	1.42(0.94-2.14)	NA
Lymphoma	Mature T/NK-cell lymphomas	IVW	0.23(0.12-0.43)	NA
		MR Egger	0.00(0.00-433.32)	0.432
		Weighted median	0.23(0.11-0.48)	NA
Small intestine	Benign Neoplasm	IVW	0.54(0.39-0.76)	NA
		MR Egger	11.08(0.01-1.04*104)	0.412
		Weighted median	0.57(0.39-0.86)	NA
Small intestine	Malignant Neoplasm	IVW	0.75(0.46-1.23)	NA
		MR Egger	0.00(0.00-0.43)	0.072
		Weighted median	0.64(0.36-1.14)	NA
Bone and articular cartilage	Benign Neoplasm	IVW	0.59(0.47-0.74)	NA
		MR Egger	0.01(0.00-1.06)	0.124
		Weighted median	0.51(0.39-0.68)	NA
Bone and articular cartilage	Malignant Neoplasm	IVW	0.35(0.17-0.71)	NA
		MR Egger	6.10*106(2.68-1.37*1013)	0.087
		Weighted median	0.29(0.12-0.69)	NA
Eye and adnexa	Benign Neoplasm	IVW	0.99(0.79-1.25)	NA
		MR Egger	1.89(0.02-198.78)	0.794
		Weighted median	1.00(0.76-1.31)	NA
Eye and adnexa	Malignant Neoplasm	IVW	2.47(1.34-4.55)	NA
		MR Egger	3499.77(0.01-1.01*109)	0.29
		Weighted median	3.05(1.39-6.69)	NA
Larynx	Benign Neoplasm	IVW	2.01.00(1.36-2.96)	NA
		MR Egger	0.27(0.00-785.46)	0.633
		Weighted median	1.8(1.11-2.92)	NA
Larynx	Malignant Neoplasm	IVW	0.91(0.51-1.64)	NA
		MR Egger	0.00(0.00-43.09)	0.221
		Weighted median	0.71.00(0.35-1.46)	NA
Pancreas	Benign Neoplasm	IVW	0.08(0.04-0.16)	NA
		MR Egger	0.00(0.00-761.34)	0.447
		Weighted median	0.05(0.03-0.12)	NA
Pancreas	Malignant Neoplasm	IVW	0.70(0.51-0.96)	NA
		MR Egger	0.22(0.00-153.35)	0.737
		Weighted median	0.63(0.43-0.92)	NA
Oesophagus	Benign Neoplasm	IVW	0.42(0.22-0.81)	NA
		MR Egger	0.00(0.00-369.91)	0.367
		Weighted median	0.36(0.16-0.8)	NA
Oesophagus	Malignant Neoplasm	IVW	1.65(0.99-2.76)	NA
		MR Egger	1363.08(0.04-5.08*107)	0.246
		Weighted median	1.87(0.98-3.58)	NA
Stomach	Benign Neoplasm	IVW	1.25(1.00-1.56)	NA
		MR Egger	15.55(0.16-1467.49)	0.308
		Weighted median	1.33(1.01-1.74)	NA
Stomach	Malignant Neoplasm	IVW	0.91(0.67-1.25)	NA
		MR Egger	23.2(0.04-14007.11)	0.351
		Weighted median	0.96(0.65-1.42)	NA
Liver/bile ducts	Benign Neoplasm	IVW	2.12(1.32-3.43)	NA
		MR Egger	1662.88(0.09-3.12*107)	0.221
		Weighted median	2.44(1.33-4.47)	NA
Liver/bile ducts	Malignant Neoplasm	IVW	0.81.00(0.52-1.27)	NA
		MR Egger	113.85(0.01-1.08*106)	0.32
		Weighted median	0.8(0.47-1.37)	NA
Ovarian	NA	IVW	0.90(0.83-0.97)	NA
		MR Egger	0.03(0.00-56.9)	0.398
		Weighted median	0.89(0.81-0.98)	NA
Ovarian	Clear cell	IVW	0.56(0.44-0.72)	NA
		MR Egger	0.00(0.00-3712572.19)	0.551
		Weighted median	0.55(0.41-0.74)	NA
Ovarian	Endometrioid	IVW	0.64(0.54-0.77)	NA
		MR Egger	4.93(0.00-8.15*107)	0.817
		Weighted median	0.65(0.53-0.79)	NA
Ovarian	Serous	IVW	0.93(0.84-1.02)	NA
		MR Egger	0.02(0.00-127.94)	0.413
		Weighted median	0.91.00(0.81-1.02)	NA
Skin	Non-melanoma	IVW	1.11.00(1.01-1.21)	NA
		MR Egger	4.14(0.69-24.72)	0.185
		Weighted median	1.12(1.01-1.25)	NA
Skin	Melanoma	IVW	1.74(1.17-2.59)	NA
		MR Egger	6454.12(1.89-2.20*107)	0.083
		Weighted median	2.01(1.23-3.28)	NA
Prostate	Benign Neoplasm	IVW	1.89(0.88-4.07)	NA
		MR Egger	12.3(0.00-8.00*10-7)	0.821
		Weighted median	2.08(0.81-5.3)	NA
Prostate	Malignant Neoplasm	IVW	1.26(1.12-1.41)	NA
		MR Egger	14.65(1.33-161.81)	0.08
		Weighted median	1.28(1.11-1.48)	NA
Colon	Adenocarcinoma	IVW	0.84(0.68-1.04)	NA
		MR Egger	1.05(0.01-82.56)	0.922
		Weighted median	0.86(0.66-1.1)	NA
Colon	Ascending	IVW	0.67(0.54-0.84)	NA
		MR Egger	0.00(0.00-0.42)	0.063
		Weighted median	0.6(0.45-0.8)	NA
Colon	Descending	IVW	0.60(0.44-0.81)	NA
		MR Egger	0.04(0.00-22.42)	0.431
		Weighted median	0.59(0.41-0.84)	NA
Colon	Sigmoid	IVW	1.31(1.10-1.55)	NA
		MR Egger	8.76(0.26-294.82)	0.994
		Weighted median	1.32(1.07-1.63)	NA
Colon	Transverse	IVW	1.20(0.94-1.54)	NA
		MR Egger	2.62(0.02-450.51)	0.991
		Weighted median	1.24(0.91-1.69)	NA
Colon	Benign Neoplasm	IVW	0.70(0.61-0.80)	NA
		MR Egger	0.04(0.00-0.61)	0.075
		Weighted median	0.65(0.55-0.77)	NA
Colon	Malignant Neoplasm	IVW	0.95(0.79-1.15)	NA
		MR Egger	0.44(0.01-20.71)	0.706
		Weighted median	0.93(0.75-1.16)	NA
Lung	Squamous cell carcinoma	IVW	0.80(0.68-0.94)	NA
		MR Egger	0.05(0.00-1.08)	0.115
		Weighted median	0.75(0.62-0.91)	NA
Lung	Adenocarcinoma	IVW	1.10(0.94-1.28)	NA
		MR Egger	0.23(0.01-4.73)	0.341
		Weighted median	1.07(0.88-1.29)	NA
Breast	NA	IVW	0.97(0.94-1.01)	NA
		MR Egger	0.77(0.02-29)	0.9
		Weighted median	0.98(0.93-1.02)	NA
Breast	ER+	IVW	0.93(0.88-0.97)	NA
		MR Egger	0.25(0.00-19.09)	0.569
		Weighted median	0.93(0.88-0.98)	NA
Breast	ER-	IVW	1.03(0.96-1.11)	NA
		MR Egger	1.33(0.00-988.1)	0.942
		Weighted median	1.03(0.95-1.12)	NA
S6 Table. Sensitivity analyses that were conducted to assess the association between genetically regular use of glucosamine and the risk of non-neoplastic disease
Disease	Sensitivity analyses	OR(95%CI)	Pintercept
Parkinson's disease	Inverse variance weighted	0.87(0.76-1.01)	NA
	MR Egger	39.48(0-4.26*106)	0.548
	Weighted median	0.87(0.73-1.04)	NA
Alzheimer's disease	Inverse variance weighted	0.95(0.86-1.05)	NA
	MR Egger	0.11(0-483.33)	0.64
	Weighted median	0.95(0.84-1.07)	NA
Amyotrophic lateral sclerosis	Inverse variance weighted	1.04(1.02-1.06)	NA
	MR Egger	1.35(0.92-2.00)	0.222
	Weighted median	1.05(1.02-1.07)	NA
Bipolar disorder	Inverse variance weighted	1.16(1.05-1.27)	NA
	MR Egger	767.02(0.32-1.85*106)	0.163
	Weighted median	1.19(1.06-1.34)	NA
Anorexia nervosa	Inverse variance weighted	0.75(0.64-0.89)	NA
	MR Egger	0.06(0-1.56)	0.164
	Weighted median	0.72(0.59-0.89)	NA
Autism spectrum disorder	Inverse variance weighted	0.84(0.77-0.91)	NA
	MR Egger	0.17(0.04-0.82)	0.082
	Weighted median	0.83(0.75-0.93)	NA
Multiple sclerosis	Inverse variance weighted	0.73(0.66-0.82)	NA
	MR Egger	0(0-6.18)	0.189
	Weighted median	0.72(0.63-0.83)	NA
Atopic dermatitis	Inverse variance weighted	1.24(1.11-1.39)	NA
	MR Egger	2.31(0.23-23.55)	0.613
	Weighted median	1.29(1.12-1.49)	NA
Autoimmune thyroiditis	Inverse variance weighted	2.47(1.49-4.08)	NA
	MR Egger	9.97*104(3.33-2.98*109)	0.078
	Weighted median	2.96(1.59-5.49)	NA
Chronic sinusitis	Inverse variance weighted	1.28(1.17-1.40)	NA
	MR Egger	3.78(0.59-24.08)	0.283
	Weighted median	1.29(1.16-1.44)	NA
Asthma	Inverse variance weighted	1.20(1.12-1.28)	NA
	MR Egger	3.43(0.92-12.78)	0.154
	Weighted median	1.22(1.13-1.32)	NA
Interstitial lung disease	Inverse variance weighted	0.57(0.48-0.68)	NA
	MR Egger	0.01(0-0.4)	0.064
	Weighted median	0.53(0.42-0.66)	NA
Inflammatory Bowel Disease	Inverse variance weighted	0.73(0.66-0.82)	NA
	MR Egger	0.12(0.01-1.10)	0.147
	Weighted median	0.71(0.62-0.81)	NA
Gastroesophageal Reflux Disease	Inverse variance weighted	0.92(0.85-0.99)	NA
	MR Egger	0.33(0.07-1.50)	0.22
	Weighted median	0.92(0.84-1.01)	NA
Type 1 diabetes	Inverse variance weighted	0.75(0.67-0.85)	NA
	MR Egger	0.09(0.01-1.00)	0.123
	Weighted median	0.73(0.63-0.84)	NA
Bronchiectasis	Inverse variance weighted	0.64(0.4-1.03)	NA
	MR Egger	1.55(0-550.76)	0.817
	Weighted median	0.66(0.39-1.1)	NA
Idiopathic pulmonary fibrosis	Inverse variance weighted	0.66(0.38-1.13)	NA
	MR Egger	0.01(0-2.51)	0.366
	Weighted median	0.59(0.32-1.09)	NA
Autoimmune hyperthyroidism	Inverse variance weighted	1.93(1.17-3.18)	NA
	MR Egger	0.42(0-227.68)	0.716
	Weighted median	1.86(1.07-3.23)	NA
Mood disorders	Inverse variance weighted	1.13(0.99-1.29)	NA
	MR Egger	0.64(0.07-5.55)	0.699
	Weighted median	1.17(1.02-1.33)	NA
Depression	Inverse variance weighted	1.12(0.95-1.31)	NA
	MR Egger	0.79(0.05-12.02)	0.847
	Weighted median	1.18(1.03-1.35)	NA
Type 2 diabetes	Inverse variance weighted	0.89(0.84-0.94)	NA
	MR Egger	0.74(0.23-2.39)	0.766
	Weighted median	0.88(0.83-0.95)	NA
Heart failure	Inverse variance weighted	0.94(0.83-1.06)	NA
	MR Egger	0.63(0.11-3.59)	0.731
	Weighted median	0.97(0.84-1.12)	NA
S7 Table. Leave-one-out analysis that were conducted to assess the association between genetically regular use of glucosamine and the risk of cancer
Cancer site	Subype	SNP	Beta	SE	P
Haemangioma and lymphangioma	NA	rs10740101	-0.192878	0.119679	0.107044
		rs10840899	-0.272596	0.118275	0.0211797
		rs1509952	-0.191266	0.119679	0.110008
		rs4746746	-0.192723	0.119566	0.106995
		rs6479846	-0.196572	0.119566	0.100167
		rs6479848	-0.195035	0.119534	0.102758
		rs6479860	-0.192972	0.119679	0.106871
		rs7100204	-0.196726	0.119581	0.0999445
		rs7100320	-0.196071	0.119807	0.101724
		rs7665570	-0.235161	0.116562	0.0436466
		All	-0.206506	0.113065	0.0677837
Pan caner	NA	rs10740101	-0.00943937	0.00307073	0.00211221
		rs1509952	-0.00938344	0.00307077	0.00224518
		rs4746746	-0.009414	0.00306687	0.00214361
		rs6479846	-0.00903198	0.00306857	0.00324651
		rs6479848	-0.00902404	0.00306852	0.00327318
		rs7100320	-0.00885466	0.00307877	0.004027
		rs7665570	-0.0108037	0.002985	0.000295359
		All	-0.00943327	0.00283116	0.000862417
Bladder	Benign neoplasm	rs10740101	-0.00975507	0.394775	0.980286
		rs10840899	-0.0869287	0.390523	0.82385
		rs1509952	0.0017297	0.394906	0.996505
		rs4746746	-0.00801036	0.394404	0.983796
		rs6479846	0.0145182	0.394404	0.970636
		rs6479848	-0.00406731	0.394372	0.991771
		rs6479860	-0.00984947	0.394775	0.980095
		rs7100204	0.0345096	0.394484	0.93029
		rs7100320	0.0358229	0.395226	0.927779
		rs7665570	0.0981618	0.384758	0.798625
		All	0.00688343	0.373046	0.985278
Bladder	Malignant neoplasm	rs10740101	-0.261352	0.128657	0.0422162
		rs10840899	-0.308956	0.127244	0.0151795
		rs1509952	-0.251949	0.128723	0.0503123
		rs4746746	-0.258273	0.128536	0.0445016
		rs6479846	-0.263786	0.128536	0.0401477
		rs6479848	-0.261169	0.128536	0.0421667
		rs6479860	-0.261446	0.128657	0.0421419
		rs7100204	-0.267497	0.12856	0.0374597
		rs7100320	-0.267231	0.128802	0.0380103
		rs7665570	-0.280355	0.125418	0.0253938
		All	-0.268353	0.121578	0.0272973
Thyroid	Benign neoplasm	rs10740101	0.126306	0.197029	0.521487
		rs10840899	0.162454	0.19477	0.404235
		rs1509952	0.118955	0.197062	0.546081
		rs4746746	0.127443	0.196843	0.517351
		rs6479846	0.140274	0.196843	0.476083
		rs6479848	0.137464	0.196843	0.484962
		rs6479860	0.126212	0.197029	0.521799
		rs7100204	0.153487	0.196899	0.435674
		rs7100320	0.154853	0.197271	0.432467
		rs7665570	0.163099	0.19196	0.395519
		All	0.141217	0.186165	0.448118
Thyroid	Malignant neoplasm	rs10740101	-0.0721015	0.136652	0.597757
		rs10840899	-0.102974	0.135131	0.44604
		rs1509952	-0.0767761	0.136685	0.574319
		rs4746746	-0.0725743	0.136556	0.595098
		rs6479846	-0.0691799	0.136523	0.612347
		rs6479848	-0.0684314	0.136523	0.6162
		rs6479860	-0.0721015	0.136652	0.597757
		rs7100204	-0.0576729	0.136555	0.672775
		rs7100320	-0.0566717	0.136812	0.678705
		rs7665570	-0.0205354	0.133135	0.877416
		All	-0.0667388	0.129124	0.605256
Head and neck	Benign neoplasm	rs10740101	-0.922837	0.25915	0.000369416
		rs10840899	-1.00384	0.256122	8.8779e-05
		rs1509952	-0.913482	0.259216	0.000425044
		rs4746746	-0.914994	0.258906	0.000409191
		rs6479846	-0.919402	0.258906	0.000383612
		rs6479848	-0.926629	0.258873	0.000344294
		rs6479860	-0.922837	0.25915	0.000369416
		rs7100204	-0.922256	0.258987	0.000369423
		rs7100320	-0.922955	0.259444	0.000374487
		rs7665570	-0.921235	0.252388	0.000262158
		All	-0.929177	0.244843	0.000147651
Lymphoma	Diffuse large B-cell lymphoma	rs10740101	-0.499703	0.292215	0.0872563
		rs10840899	-0.610319	0.288937	0.0346613
		rs1509952	-0.508589	0.292281	0.0818468
		rs4746746	-0.498286	0.29194	0.0878579
		rs6479846	-0.492422	0.291908	0.0916213
		rs6479848	-0.489339	0.291908	0.0936707
		rs6479860	-0.499986	0.292215	0.087077
		rs7100204	-0.48912	0.291988	0.0939074
		rs7100320	-0.488846	0.292538	0.0947119
		rs7665570	-0.509624	0.28479	0.0735392
		All	-0.508851	0.276109	0.0653382
Lymphoma	Follicular lymphoma	rs10740101	0.387753	0.184387	0.0354717
		rs10840899	0.445987	0.182286	0.0144197
		rs1509952	0.388406	0.184453	0.0352284
		rs4746746	0.388655	0.184214	0.0348749
		rs6479846	0.379579	0.184214	0.039347
		rs6479848	0.389778	0.184214	0.0343531
		rs6479860	0.387753	0.184387	0.0354717
		rs7100204	0.391508	0.184257	0.0336039
		rs7100320	0.392984	0.184605	0.0332717
		rs7665570	0.481723	0.179702	0.00734748
		All	0.403913	0.174229	0.0204339
Lymphoma	Hodgkin lymphoma	rs10740101	0.0864183	0.220361	0.694934
		rs10840899	0.085632	0.21785	0.694262
		rs1509952	0.0782978	0.220426	0.722432
		rs4746746	0.0859096	0.220186	0.696412
		rs6479846	0.0691433	0.220154	0.753469
		rs6479848	0.0704529	0.220154	0.748956
		rs6479860	0.0864183	0.220361	0.694934
		rs7100204	0.0371084	0.220199	0.866173
		rs7100320	0.0374103	0.220614	0.865345
		rs7665570	0.137397	0.214788	0.522378
		All	0.0777521	0.208225	0.708847
Lymphoma	Non-follicular lymphoma	rs10740101	0.0372501	0.118627	0.753513
		rs10840899	0.0241418	0.117272	0.836899
		rs1509952	0.0378255	0.11866	0.749899
		rs4746746	0.0380472	0.118516	0.748187
		rs6479846	0.0361766	0.118516	0.760178
		rs6479848	0.0324355	0.118516	0.78433
		rs6479860	0.0371557	0.118627	0.754118
		rs7100204	0.043502	0.118562	0.713684
		rs7100320	0.0427622	0.118786	0.718852
		rs7665570	0.0324678	0.115615	0.778844
		All	0.0361279	0.112095	0.747227
Lymphoma	Non-Hodgkin lymphoma	rs10740101	0.312775	0.182484	0.0865309
		rs10840899	0.373284	0.180388	0.038514
		rs1509952	0.316364	0.18255	0.0830898
		rs4746746	0.312141	0.182312	0.0868737
		rs6479846	0.295953	0.182312	0.104519
		rs6479848	0.301567	0.182312	0.0981018
		rs6479860	0.312775	0.182484	0.0865309
		rs7100204	0.309562	0.182354	0.0895861
		rs7100320	0.306699	0.182698	0.0932058
		rs7665570	0.322812	0.17786	0.069527
		All	0.316553	0.17243	0.0663832
Lymphoma	Mature T/NK-cell lymphomas	rs10740101	-1.48283	0.34338	1.57218e-05
		rs10840899	-1.55484	0.339521	4.66067e-06
		rs1509952	-1.47791	0.343479	1.68682e-05
		rs4746746	-1.48094	0.34309	1.58528e-05
		rs6479846	-1.46223	0.343058	2.0229e-05
		rs6479848	-1.46114	0.343026	2.04823e-05
		rs6479860	-1.48283	0.34338	1.57218e-05
		rs7100204	-1.43874	0.343153	2.7564e-05
		rs7100320	-1.44	0.343801	2.80825e-05
		rs7665570	-1.50799	0.334627	6.59061e-06
		All	-1.47927	0.324467	5.13794e-06
Small intestine	Benign neoplasm	rs10740101	-0.620285	0.180441	0.000586905
		rs10840899	-0.573492	0.178463	0.00131124
		rs1509952	-0.617579	0.180507	0.0006231
		rs4746746	-0.620601	0.180304	0.000577501
		rs6479846	-0.616371	0.180272	0.00062825
		rs6479848	-0.618707	0.180272	0.000598986
		rs6479860	-0.620473	0.180441	0.000584643
		rs7100204	-0.629926	0.180344	0.00047779
		rs7100320	-0.630757	0.180685	0.000481347
		rs7665570	-0.584786	0.175823	0.000881038
		All	-0.613059	0.170514	0.000323951
Small intestine	Malignant neoplasm	rs10740101	-0.26307	0.26573	0.32218
		rs10840899	-0.446346	0.2629	0.08955
		rs1509952	-0.270843	0.265796	0.308209
		rs4746746	-0.261601	0.265481	0.324436
		rs6479846	-0.25777	0.265481	0.33157
		rs6479848	-0.256276	0.265481	0.334381
		rs6479860	-0.263164	0.26573	0.322006
		rs7100204	-0.263438	0.265536	0.321149
		rs7100320	-0.262639	0.266036	0.323529
		rs7665570	-0.284189	0.259042	0.272608
		All	-0.28328	0.251113	0.259279
Bone and articular cartilage	Benign neoplasm	rs10740101	-0.507901	0.122572	3.41758e-05
		rs10840899	-0.576657	0.121122	1.92677e-06
		rs1509952	-0.50391	0.122605	3.95615e-05
		rs4746746	-0.50693	0.122457	3.47814e-05
		rs6479846	-0.509648	0.122457	3.15667e-05
		rs6479848	-0.510116	0.122457	3.10417e-05
		rs6479860	-0.507901	0.122572	3.41758e-05
		rs7100204	-0.52092	0.122507	2.11715e-05
		rs7100320	-0.520963	0.122739	2.19106e-05
		rs7665570	-0.591831	0.119378	7.13565e-07
		All	-0.526148	0.11581	5.54019e-06
Bone and articular cartilage	Malignant neoplasm	rs10740101	-1.03087	0.38452	0.00734163
		rs10840899	-1.27538	0.380106	0.000792737
		rs1509952	-1.04008	0.384618	0.00684711
		rs4746746	-1.03279	0.38419	0.00718351
		rs6479846	-1.01015	0.384158	0.00855053
		rs6479848	-1.00891	0.384126	0.00862658
		rs6479860	-1.03087	0.38452	0.00734163
		rs7100204	-1.024	0.384228	0.00769658
		rs7100320	-1.02449	0.384952	0.0077829
		rs7665570	-1.04671	0.37466	0.00520984
		All	-1.05289	0.363317	0.00375546
Eye and adnexa	Benign neoplasm	rs10740101	-0.00841819	0.122424	0.945179
		rs10840899	0.0042098	0.121033	0.972253
		rs1509952	-0.00443737	0.122457	0.971094
		rs4746746	-0.0100982	0.122342	0.934217
		rs6479846	-0.00333275	0.122342	0.978267
		rs6479848	-0.00139012	0.122309	0.990932
		rs6479860	-0.00841819	0.122424	0.945179
		rs7100204	-0.00990497	0.122359	0.935482
		rs7100320	-0.0111098	0.122591	0.92779
		rs7665570	-0.0217932	0.119267	0.855012
		All	-0.00751686	0.115685	0.948192
Eye and adnexa	Malignant neoplasm	rs10740101	0.883735	0.329977	0.0074025
		rs10840899	0.985379	0.326122	0.00251519
		rs1509952	0.876584	0.330076	0.00791421
		rs4746746	0.883982	0.329698	0.00733623
		rs6479846	0.868402	0.329698	0.00844037
		rs6479848	0.869497	0.329666	0.00835178
		rs6479860	0.883735	0.329977	0.0074025
		rs7100204	0.862603	0.329749	0.00889837
		rs7100320	0.864283	0.330372	0.00889428
		rs7665570	1.04772	0.321426	0.00111571
		All	0.903554	0.311778	0.0037547
Larynx	Benign neoplasm	rs10740101	0.710824	0.209632	0.000696834
		rs10840899	0.68251	0.207189	0.000987226
		rs1509952	0.70919	0.209698	0.000719697
		rs4746746	0.710695	0.209435	0.000690306
		rs6479846	0.709758	0.209435	0.000701668
		rs6479848	0.710976	0.209435	0.000686931
		rs6479860	0.71073	0.209632	0.000697982
		rs7100204	0.708891	0.209502	0.000715161
		rs7100320	0.71121	0.209898	0.000703107
		rs7665570	0.613363	0.204183	0.0026647
		All	0.69733	0.198068	0.000430484
Larynx	Malignant neoplasm	rs10740101	-0.0581904	0.313813	0.852891
		rs10840899	-0.187283	0.310228	0.546047
		rs1509952	-0.064048	0.313945	0.838345
		rs4746746	-0.0630398	0.31355	0.840658
		rs6479846	-0.0566917	0.313485	0.856491
		rs6479848	-0.0561309	0.313485	0.857895
		rs6479860	-0.058285	0.313813	0.852655
		rs7100204	-0.0596337	0.313586	0.849178
		rs7100320	-0.0585603	0.314177	0.852137
		rs7665570	-0.219977	0.305736	0.471833
		All	-0.0890997	0.296512	0.763801
Pancreas	Benign neoplasm	rs10740101	-2.5261	0.422448	2.23595e-09
		rs10840899	-2.6107	0.416411	3.62145e-10
		rs1509952	-2.52112	0.422004	2.31278e-09
		rs4746746	-2.5364	0.423066	2.03142e-09
		rs6479846	-2.5195	0.421205	2.20895e-09
		rs6479848	-2.51772	0.420966	2.22034e-09
		rs6479860	-2.52619	0.422459	2.23492e-09
		rs7100204	-2.52083	0.421496	2.22228e-09
		rs7100320	-2.52416	0.422786	2.36819e-09
		rs7665570	-2.84423	0.320311	6.71186e-19
		All	-2.56628	0.378304	1.17173e-11
Pancreas	Malignant neoplasm	rs10740101	-0.343774	0.172053	0.0457095
		rs10840899	-0.365549	0.170046	0.031579
		rs1509952	-0.3519	0.172086	0.0408643
		rs4746746	-0.342353	0.171891	0.0464058
		rs6479846	-0.343197	0.171891	0.0458692
		rs6479848	-0.343808	0.171859	0.0454435
		rs6479860	-0.343774	0.172053	0.0457095
		rs7100204	-0.359749	0.171923	0.0363937
		rs7100320	-0.359713	0.172248	0.0367668
		rs7665570	-0.417871	0.167587	0.0126504
		All	-0.357505	0.162553	0.027856
Oesophagus	Benign neoplasm	rs10740101	-0.839022	0.346451	0.0154453
		rs10840899	-0.937628	0.342347	0.00616589
		rs1509952	-0.847391	0.346549	0.0144763
		rs4746746	-0.840434	0.346157	0.0151865
		rs6479846	-0.835122	0.346124	0.0158314
		rs6479848	-0.832122	0.346124	0.0162118
		rs6479860	-0.839022	0.346451	0.0154453
		rs7100204	-0.827473	0.346223	0.0168483
		rs7100320	-0.827558	0.346877	0.017045
		rs7665570	-0.947427	0.337446	0.0049906
		All	-0.857987	0.327333	0.00876353
Oesophagus	Malignant neoplasm	rs10740101	0.488551	0.277178	0.0779692
		rs10840899	0.602797	0.27407	0.0278475
		rs1509952	0.479795	0.277276	0.0835616
		rs4746746	0.487943	0.276917	0.0780601
		rs6479846	0.484614	0.276885	0.0800774
		rs6479848	0.485735	0.276885	0.0793817
		rs6479860	0.488551	0.277178	0.0779692
		rs7100204	0.493968	0.276983	0.0745233
		rs7100320	0.495694	0.277505	0.0740587
		rs7665570	0.521982	0.270095	0.0532874
		All	0.503281	0.261903	0.0546524
Stomach	Benign neoplasm	rs10740101	0.21268	0.11939	0.0748493
		rs10840899	0.255518	0.117991	0.0303437
		rs1509952	0.213493	0.119423	0.0738234
		rs4746746	0.214339	0.119277	0.0723393
		rs6479846	0.210772	0.119277	0.0772163
		rs6479848	0.209424	0.119245	0.0790463
		rs6479860	0.21268	0.11939	0.0748493
		rs7100204	0.21841	0.119292	0.0671179
		rs7100320	0.21773	0.119517	0.0684946
		rs7665570	0.245054	0.116265	0.035055
		All	0.221216	0.112793	0.0498497
Stomach	Malignant neoplasm	rs10740101	-0.102432	0.168651	0.543612
		rs10840899	-0.0398687	0.166757	0.811042
		rs1509952	-0.106747	0.168684	0.526851
		rs4746746	-0.0995159	0.168493	0.554772
		rs6479846	-0.0970573	0.168461	0.564519
		rs6479848	-0.0928578	0.168461	0.581487
		rs6479860	-0.102432	0.168651	0.543612
		rs7100204	-0.0863209	0.168522	0.608494
		rs7100320	-0.085744	0.168839	0.611563
		rs7665570	-0.0940008	0.164361	0.567379
		All	-0.0906032	0.159352	0.569647
Liver/bile ducts	Benign neoplasm	rs10740101	0.7367	0.258443	0.00436458
		rs10840899	0.84563	0.255457	0.000932067
		rs1509952	0.746315	0.258509	0.00388933
		rs4746746	0.736586	0.258232	0.00433879
		rs6479846	0.73138	0.2582	0.00461692
		rs6479848	0.741121	0.2582	0.00410029
		rs6479860	0.7367	0.258443	0.00436458
		rs7100204	0.72867	0.25828	0.00478392
		rs7100320	0.730384	0.258768	0.00476449
		rs7665570	0.795802	0.251738	0.00157103
		All	0.753369	0.244192	0.00203449
Liver/bile ducts	Malignant neoplasm	rs10740101	-0.208013	0.240171	0.386434
		rs10840899	-0.120417	0.237323	0.611876
		rs1509952	-0.193616	0.240237	0.42028
		rs4746746	-0.211492	0.239944	0.378091
		rs6479846	-0.20849	0.239912	0.384833
		rs6479848	-0.208115	0.239912	0.385688
		rs6479860	-0.208013	0.240171	0.386434
		rs7100204	-0.22036	0.239976	0.358482
		rs7100320	-0.220116	0.240429	0.359921
		rs7665570	-0.293315	0.23389	0.209816
		All	-0.209436	0.226898	0.355986
Ovarian	NA	rs10740101	-0.111149	0.0444405	0.0123815
		rs1509952	-0.109423	0.0444141	0.0137508
		rs4746746	-0.109548	0.0443907	0.013594
		rs6479846	-0.107128	0.0443944	0.0158171
		rs6479848	-0.107087	0.0443944	0.0158576
		rs6479860	-0.111066	0.0444405	0.0124473
		rs7100204	-0.105991	0.0443955	0.0169663
		rs7100320	-0.105903	0.0444914	0.0172982
		rs7665570	-0.12303	0.0433003	0.00449263
		All	-0.110111	0.0417584	0.00836741
Ovarian	Clear cell	rs10740101	-0.575892	0.133185	1.53215e-05
		rs1509952	-0.575763	0.133113	1.52272e-05
		rs4746746	-0.577884	0.133024	1.39777e-05
		rs6479846	-0.572259	0.133069	1.70432e-05
		rs6479848	-0.572106	0.133065	1.71224e-05
		rs6479860	-0.579021	0.133173	1.3746e-05
		rs7100204	-0.570438	0.133079	1.81547e-05
		rs7100320	-0.569661	0.133376	1.94508e-05
		rs7665570	-0.604095	0.129702	3.19985e-06
		All	-0.577617	0.125149	3.92259e-06
Ovarian	Endometrioid	rs10740101	-0.445405	0.0954462	3.06287e-06
		rs1509952	-0.443904	0.0953933	3.26484e-06
		rs4746746	-0.44264	0.0953395	3.43767e-06
		rs6479846	-0.44141	0.0953732	3.68787e-06
		rs6479848	-0.44141	0.0953732	3.68787e-06
		rs6479860	-0.445154	0.0954462	3.10224e-06
		rs7100204	-0.444931	0.0953671	3.07938e-06
		rs7100320	-0.446134	0.0955773	3.04471e-06
		rs7665570	-0.437906	0.0928809	2.4206e-06
		All	-0.443177	0.0896825	7.74773e-07
Ovarian	Serous	rs10740101	-0.0783802	0.0513289	0.126756
		rs1509952	-0.0755467	0.0512988	0.140837
		rs4746746	-0.0762838	0.051272	0.136797
		rs6479846	-0.0739656	0.0512794	0.149189
		rs6479848	-0.0739449	0.0512794	0.149303
		rs6479860	-0.0781212	0.0513252	0.127988
		rs7100204	-0.0726417	0.0512802	0.15661
		rs7100320	-0.0723951	0.0513904	0.158916
		rs7665570	-0.0914143	0.050023	0.067633
		All	-0.077049	0.0482334	0.110172
Skin	Melanoma	rs10740101	0.546534	0.214334	0.0107748
		rs10840899	0.681701	0.211951	0.00129849
		rs1509952	0.55513	0.2144	0.00961908
		rs4746746	0.538895	0.214133	0.0118479
		rs6479846	0.53478	0.214133	0.0125099
		rs6479848	0.531014	0.214101	0.0131306
		rs6479860	0.54644	0.214334	0.0107884
		rs7100204	0.532219	0.214172	0.0129549
		rs7100320	0.533685	0.214575	0.0128764
		rs7665570	0.545233	0.208949	0.00906993
		All	0.55479	0.202532	0.00615771
Skin	Non-melanoma	rs10740101	0.095482	0.0469072	0.0417953
		rs10840899	0.120811	0.0463686	0.00917538
		rs1509952	0.09906	0.0469402	0.0348287
		rs4746746	0.0956189	0.0468631	0.0413117
		rs6479846	0.0972091	0.0468631	0.0380497
		rs6479848	0.0983315	0.0468631	0.0358813
		rs6479860	0.0953876	0.0469072	0.0419981
		rs7100204	0.0997351	0.0468748	0.0333627
		rs7100320	0.100587	0.0469631	0.0322078
		rs7665570	0.0967728	0.0457111	0.0342552
		All	0.0999298	0.044324	0.0241626
Prostate	Benign neoplasm	rs10740101	0.625397	0.413927	0.130817
		rs10840899	0.673889	0.409502	0.0998405
		rs1509952	0.659647	0.414123	0.111188
		rs4746746	0.625643	0.413571	0.130335
		rs6479846	0.621282	0.413539	0.133006
		rs6479848	0.622049	0.413507	0.132498
		rs6479860	0.625302	0.413927	0.130875
		rs7100204	0.663829	0.413669	0.108552
		rs7100320	0.646514	0.414446	0.118772
		rs7665570	0.605326	0.403963	0.134012
		All	0.636802	0.391219	0.103581
Prostate	Malignant neoplasm	rs10740101	0.225837	0.0632457	0.000355915
		rs10840899	0.270941	0.0625433	1.47725e-05
		rs1509952	0.229901	0.0632786	0.00027998
		rs4746746	0.225469	0.0631863	0.000359273
		rs6479846	0.22846	0.0631863	0.000299587
		rs6479848	0.227619	0.0631863	0.00031536
		rs6479860	0.225742	0.0632457	0.000357948
		rs7100204	0.227384	0.0631812	0.000319546
		rs7100320	0.226363	0.0632995	0.0003488
		rs7665570	0.205647	0.0616845	0.000856517
		All	0.229308	0.0597651	0.000124639
Colon	Adenocarcinoma	rs10740101	-0.179828	0.115086	0.118158
		rs10840899	-0.177566	0.113817	0.118735
		rs1509952	-0.181171	0.115119	0.115539
		rs4746746	-0.178982	0.114978	0.119551
		rs6479846	-0.180665	0.114978	0.116112
		rs6479848	-0.185248	0.114978	0.107144
		rs6479860	-0.179922	0.115086	0.117965
		rs7100204	-0.177834	0.114989	0.121977
		rs7100320	-0.177519	0.115205	0.123343
		rs7665570	-0.154248	0.112179	0.169126
		All	-0.177181	0.108748	0.103254
Colon	Ascending colon	rs10740101	-0.388796	0.11959	0.00114964
		rs10840899	-0.467533	0.118162	7.59908e-05
		rs1509952	-0.384164	0.119623	0.00132059
		rs4746746	-0.387699	0.119477	0.00117463
		rs6479846	-0.396325	0.119477	0.000909367
		rs6479848	-0.392949	0.119477	0.00100575
		rs6479860	-0.388891	0.11959	0.00114644
		rs7100204	-0.378147	0.119524	0.00155743
		rs7100320	-0.380943	0.119751	0.00146703
		rs7665570	-0.44469	0.116467	0.00013445
		All	-0.401408	0.112989	0.000381418
Colon	Descending colon	rs10740101	-0.511346	0.164273	0.00185337
		rs10840899	-0.553395	0.162345	0.000652593
		rs1509952	-0.505921	0.164339	0.00208036
		rs4746746	-0.51011	0.164151	0.00188636
		rs6479846	-0.508324	0.164151	0.00195699
		rs6479848	-0.503276	0.164119	0.00216558
		rs6479860	-0.511346	0.164273	0.00185337
		rs7100204	-0.500957	0.164176	0.00227817
		rs7100320	-0.506986	0.164486	0.00205449
		rs7665570	-0.494569	0.159983	0.00199229
		All	-0.510636	0.155217	0.00100249
Colon	Sigmoid colon	rs10740101	0.256464	0.0922703	0.0054444
		rs10840899	0.294768	0.0911904	0.00122734
		rs1509952	0.256102	0.0923032	0.00552735
		rs4746746	0.256606	0.0921834	0.00537518
		rs6479846	0.266072	0.0921834	0.00389762
		rs6479848	0.268321	0.0921834	0.00360583
		rs6479860	0.25637	0.0922703	0.00546162
		rs7100204	0.272026	0.0922053	0.00317548
		rs7100320	0.270427	0.0923794	0.00341865
		rs7665570	0.280489	0.0898769	0.00180354
		All	0.267895	0.0871795	0.00211981
Colon	Transverse colon	rs10740101	0.180147	0.134765	0.181305
		rs10840899	0.18663	0.133136	0.160974
		rs1509952	0.184992	0.134798	0.169951
		rs4746746	0.178977	0.134638	0.183742
		rs6479846	0.178601	0.134638	0.184664
		rs6479848	0.180309	0.134606	0.180397
		rs6479860	0.180052	0.134765	0.181535
		rs7100204	0.169244	0.134667	0.208841
		rs7100320	0.169976	0.134922	0.207738
		rs7665570	0.227524	0.131187	0.0828566
		All	0.183891	0.127311	0.14862
Colon	Benign neoplasm	rs10740101	-0.350243	0.0752369	3.23651e-06
		rs10840899	-0.405354	0.0743888	5.06185e-08
		rs1509952	-0.352247	0.0752697	2.87162e-06
		rs4746746	-0.351041	0.0751662	3.00921e-06
		rs6479846	-0.353564	0.0751662	2.55415e-06
		rs6479848	-0.351975	0.0751662	2.83227e-06
		rs6479860	-0.349677	0.0752369	3.35683e-06
		rs7100204	-0.361284	0.0752044	1.55501e-06
		rs7100320	-0.362453	0.0753467	1.50581e-06
		rs7665570	-0.372734	0.0733178	3.69923e-07
		All	-0.361215	0.0710968	3.76232e-07
Colon	Malignant neoplasm	rs10740101	-0.048773	0.101403	0.630529
		rs10840899	-0.062181	0.100281	0.535213
		rs1509952	-0.0464797	0.101436	0.646795
		rs4746746	-0.0479079	0.101308	0.636288
		rs6479846	-0.0509917	0.101308	0.614728
		rs6479848	-0.0540755	0.101308	0.593497
		rs6479860	-0.0488673	0.101403	0.629867
		rs7100204	-0.0497346	0.101338	0.623583
		rs7100320	-0.0490423	0.101529	0.629069
		rs7665570	-0.0537778	0.0988495	0.586416
		All	-0.0512216	0.0958232	0.592966
Lung	Squamous cell carcinoma	rs10740101	-0.217966	0.0865958	0.0118341
		rs10840899	-0.268721	0.086627	0.0019219
		rs1509952	-0.215271	0.0866781	0.0130075
		rs4746746	-0.215149	0.0865977	0.0129747
		rs6479846	-0.208144	0.0865353	0.016159
		rs6479848	-0.20863	0.0865404	0.0159183
		rs6479860	-0.217524	0.0867134	0.0121233
		rs7100204	-0.216084	0.0865857	0.0125743
		rs7100320	-0.21634	0.0867451	0.0126322
		rs7665570	-0.250322	0.0850614	0.00325219
		All	-0.223511	0.082027	0.00643319
Lung	Adenocarcinoma	rs10740101	0.0966841	0.0845039	0.252566
		rs10840899	0.07134	0.0843276	0.397561
		rs1509952	0.095903	0.0845699	0.256791
		rs4746746	0.0966031	0.0844817	0.25284
		rs6479846	0.105257	0.0844193	0.212457
		rs6479848	0.104282	0.0844296	0.216779
		rs6479860	0.095431	0.084591	0.259258
		rs7100204	0.102566	0.0844033	0.224292
		rs7100320	0.102484	0.0845641	0.225549
		rs7665570	0.0654626	0.0824345	0.427127
		All	0.0934543	0.0799413	0.242389
Breast	NA	rs10740101	-0.0279078	0.0206532	0.176613
		rs1509952	-0.0282213	0.0206532	0.171802
		rs4746746	-0.0278588	0.0206317	0.176923
		rs6479846	-0.0237204	0.0206317	0.250265
		rs6479848	-0.0236169	0.0206317	0.252338
		rs6479860	-0.0280123	0.0206532	0.174998
		rs7100204	-0.0227873	0.0206532	0.269883
		rs7100320	-0.0229978	0.0206968	0.266494
		rs7665570	-0.0257398	0.0200632	0.199514
		All	-0.0256528	0.0194056	0.186192
Breast	ER+	rs10740101	-0.0792621	0.0246045	0.00127548
		rs1509952	-0.0796779	0.0246045	0.00120227
		rs4746746	-0.079162	0.0245791	0.00127877
		rs6479846	-0.0749878	0.0246169	0.0023176
		rs6479848	-0.0748822	0.0246169	0.00235091
		rs6479860	-0.0791581	0.0246045	0.00129442
		rs7100204	-0.0730249	0.0246045	0.002998
		rs7100320	-0.0734234	0.0246563	0.00290248
		rs7665570	-0.0808072	0.0238947	0.000720135
		All	-0.077181	0.0231253	0.000845343
Breast	ER-	rs10740101	0.0306994	0.0376752	0.415161
		rs1509952	0.0306188	0.0375987	0.41544
		rs4746746	0.029543	0.0375972	0.431998
		rs6479846	0.0314111	0.0375972	0.403456
		rs6479848	0.0314111	0.0375972	0.403456
		rs6479860	0.0301866	0.0376364	0.422519
		rs7100204	0.0324735	0.0375987	0.38776
		rs7100320	0.0325617	0.037677	0.38746
		rs7665570	0.0332123	0.0365733	0.363825
		All	0.0313581	0.0353564	0.375125
S8 Table. Leave-one-out analysis that were conducted to assess the association between genetically regular use of glucosamine and the risk of non-communicable diseases
Cancer site	SNP	Beta	SE	P
Parkinson's disease	rs10740101	-0.145789	0.0791021	0.0653214
	rs1509952	-0.148557	0.079191	0.0606653
	rs4746746	-0.136176	0.0804178	0.0903865
	rs6479846	-0.132149	0.0806105	0.101141
	rs6479848	-0.131998	0.0806105	0.101531
	rs7100320	-0.134101	0.0809128	0.0974479
	rs7665570	-0.114868	0.077997	0.140827
	All	-0.134746	0.0738948	0.0682307
Alzheimer's disease	rs10740101	-0.0477993	0.0560649	0.393898
	rs1509952	-0.051285	0.0560056	0.359818
	rs4746746	-0.0517332	0.0559279	0.354968
	rs6479846	-0.0425542	0.0559861	0.447204
	rs6479848	-0.042834	0.0559861	0.444222
	rs7100320	-0.0406269	0.0561033	0.468976
	rs7665570	-0.0565731	0.0542896	0.297383
	All	-0.0477147	0.0516201	0.355307
Bipolar disorder	rs10740101	0.139213	0.0520096	0.00743548
	rs1509952	0.139772	0.0520096	0.00720038
	rs4746746	0.140052	0.0519366	0.00700524
	rs6479846	0.137817	0.0519366	0.00796451
	rs6479848	0.137531	0.0519366	0.00809556
	rs7100320	0.140088	0.0520366	0.0071003
	rs7665570	0.179743	0.0503204	0.000354308
	All	0.145217	0.0478934	0.0024286
Anorexia nervosa	rs10740101	-0.278379	0.0902977	0.00204996
	rs10840899	-0.32539	0.0898465	0.00029276
	rs1509952	-0.281534	0.090266	0.00181506
	rs4746746	-0.27604	0.0902143	0.00221466
	rs6479846	-0.272824	0.0902143	0.00249315
	rs6479848	-0.272912	0.0902143	0.00248512
	rs6479860	-0.276714	0.0902977	0.00218064
	rs7100204	-0.27512	0.0902346	0.00229651
	rs7100320	-0.276554	0.0904017	0.00221952
	rs7665570	-0.277559	0.0883082	0.00167184
	All	-0.281326	0.0854039	0.000987506
Autism spectrum disorder	rs10740101	-0.176769	0.0465879	0.000148053
	rs10840899	-0.206746	0.0429829	1.50964e-06
	rs1509952	-0.177042	0.0465785	0.000144155
	rs4746746	-0.176044	0.0465605	0.000156211
	rs6479846	-0.171971	0.0464312	0.000212413
	rs6479848	-0.172061	0.0464394	0.000211336
	rs6479860	-0.177692	0.0465486	0.000134894
	rs7100204	-0.172688	0.0464304	0.000199781
	rs7100320	-0.172827	0.046564	0.000205954
	rs7665570	-0.152624	0.0422219	0.000300584
	All	-0.175569	0.0415695	2.40547e-05
Eczema	rs10740101	-0.0761015	0.0544765	0.162426
	rs10840899	-0.0965246	0.0546481	0.0773469
	rs1509952	-0.0760941	0.0544823	0.162511
	rs4746746	-0.0743181	0.0544458	0.172256
	rs6479846	-0.0804211	0.0545001	0.140048
	rs6479848	-0.0804284	0.0545002	0.140012
	rs6479860	-0.0749594	0.054516	0.169132
	rs7100204	-0.0808264	0.0547278	0.139708
	rs7100320	-0.0861658	0.0545036	0.113896
	rs7665570	-0.109612	0.0534303	0.0402184
	All	-0.083643	0.0516272	0.105203
Atopic dermatitis	rs10740101	0.209357	0.0609113	0.000588012
	rs10840899	0.217884	0.0601919	0.000294811
	rs1509952	0.211821	0.0609113	0.000506057
	rs4746746	0.209768	0.0608539	0.000566694
	rs6479846	0.208173	0.0608539	0.00062423
	rs6479848	0.209674	0.0608539	0.000569937
	rs6479860	0.209357	0.0609113	0.000588012
	rs7100204	0.210158	0.0608787	0.000556298
	rs7100320	0.209433	0.0609942	0.000595485
	rs7665570	0.246135	0.0593037	3.31866e-05
	All	0.214357	0.0575472	0.000195397
Autoimmune thyroiditis	rs10740101	0.877932	0.271381	0.00121622
	rs10840899	1.06587	0.268344	7.12612e-05
	rs1509952	0.870128	0.271447	0.0013482
	rs4746746	0.878086	0.271126	0.00120092
	rs6479846	0.882296	0.271126	0.00113717
	rs6479848	0.883325	0.271126	0.00112207
	rs6479860	0.878026	0.271381	0.00121474
	rs7100204	0.894682	0.271187	0.000969834
	rs7100320	0.897078	0.271698	0.000960846
	rs7665570	0.906319	0.264486	0.000610926
	All	0.903746	0.256433	0.000424609
Chronic sinusitis	rs10740101	0.243906	0.0485681	5.11542e-07
	rs10840899	0.260073	0.0480016	6.02664e-08
	rs1509952	0.24228	0.0486012	6.19424e-07
	rs4746746	0.243208	0.0485225	5.37893e-07
	rs6479846	0.241616	0.0485225	6.37571e-07
	rs6479848	0.241616	0.0485225	6.37571e-07
	rs6479860	0.243906	0.0485681	5.11542e-07
	rs7100204	0.239142	0.0485357	8.34423e-07
	rs7100320	0.23904	0.0486273	8.84417e-07
	rs7665570	0.242469	0.0473127	2.97805e-07
	All	0.243757	0.0458909	1.08628e-07
Asthma	rs10740101	0.175765	0.0344432	3.34246e-07
	rs10840899	0.193517	0.03403	1.2956e-08
	rs1509952	0.175101	0.0344432	3.70056e-07
	rs4746746	0.175913	0.0344107	3.18502e-07
	rs6479846	0.177886	0.0344107	2.34712e-07
	rs6479848	0.177886	0.0344107	2.34712e-07
	rs6479860	0.17567	0.0344432	3.39149e-07
	rs7100204	0.176666	0.0344107	2.83576e-07
	rs7100320	0.176385	0.0344756	3.11694e-07
	rs7665570	0.187463	0.0335398	2.28035e-08
	All	0.179303	0.0325382	3.57705e-08
Interstitial lung disease	rs10740101	-0.549857	0.0969272	1.40411e-08
	rs10840899	-0.616944	0.0957963	1.19348e-10
	rs1509952	-0.550555	0.0969602	1.36158e-08
	rs4746746	-0.551775	0.0968359	1.21191e-08
	rs6479846	-0.547838	0.0968359	1.53702e-08
	rs6479848	-0.54765	0.0968359	1.55445e-08
	rs6479860	-0.549857	0.0969272	1.40411e-08
	rs7100204	-0.550358	0.0968621	1.33227e-08
	rs7100320	-0.550378	0.0970452	1.41668e-08
	rs7665570	-0.582805	0.0943891	6.6373e-10
	All	-0.560056	0.0915779	9.61761e-10
Inflammatory bowel disease	rs10740101	-0.307748	0.0586834	1.56948e-07
	rs10840899	-0.341027	0.0580018	4.11259e-09
	rs1509952	-0.310965	0.0586834	1.16417e-07
	rs4746746	-0.308162	0.0586281	1.47052e-07
	rs6479846	-0.309193	0.0586281	1.33633e-07
	rs6479848	-0.309193	0.0586281	1.33633e-07
	rs6479860	-0.307748	0.0586834	1.56948e-07
	rs7100204	-0.311548	0.0586508	1.08481e-07
	rs7100320	-0.311735	0.0587618	1.12633e-07
	rs7665570	-0.312075	0.0571683	4.79142e-08
	All	-0.312999	0.0554466	1.65138e-08
Gastroesophageal reflux disease	rs10740101	-0.084227	0.0397556	0.0341227
	rs10840899	-0.101972	0.0393102	0.00948547
	rs1509952	-0.0836662	0.0397885	0.0354857
	rs4746746	-0.0841411	0.0397184	0.0341376
	rs6479846	-0.0827423	0.0397184	0.0372307
	rs6479848	-0.0828356	0.0397184	0.0370173
	rs6479860	-0.0843212	0.0397556	0.0339228
	rs7100204	-0.081967	0.0397556	0.0392294
	rs7100320	-0.0820992	0.0398313	0.0392864
	rs7665570	-0.0663935	0.0387357	0.0865261
	All	-0.0833886	0.0375724	0.0264587
Type 1 diabetes	rs10740101	-0.274295	0.0617864	9.02075e-06
	rs10840899	-0.311121	0.0610248	3.42767e-07
	rs1509952	-0.277237	0.0617864	7.22224e-06
	rs4746746	-0.274016	0.061728	9.03384e-06
	rs6479846	-0.278246	0.061728	6.55592e-06
	rs6479848	-0.27928	0.061728	6.05758e-06
	rs6479860	-0.274295	0.0617864	9.02075e-06
	rs7100204	-0.27967	0.0617214	5.86597e-06
	rs7100320	-0.279389	0.0618375	6.23941e-06
	rs7665570	-0.297481	0.0601904	7.71916e-07
	All	-0.282651	0.0583682	1.28183e-06
Macular degeneration	rs10740101	0.00443121	0.00176686	0.0121434
	rs10840899	0.00491042	0.00176516	0.00540487
	rs1509952	0.00442583	0.00176688	0.0122492
	rs4746746	0.00442612	0.00176539	0.0121703
	rs6479846	0.00432406	0.00176618	0.0143552
	rs6479848	0.00432504	0.00176617	0.0143325
	rs6479860	0.00443561	0.00176685	0.0120572
	rs7100204	0.00436714	0.00176686	0.0134475
	rs7100320	0.00438252	0.00177003	0.0132881
	rs7665570	0.0045129	0.00173333	0.00922486
	All	0.0044544	0.0016728	0.00774828
Bronchiectasis	rs10840899	-0.393389	0.292878	0.179213
	rs7100320	-0.49221	0.315658	0.118923
	rs7665570	-0.445558	0.272076	0.1015
	All	-0.441581	0.238355	0.0639371
Idiopathic pulmonary fibrosis	rs10840899	-0.684242	0.310578	0.0275858
	rs7100320	-0.134081	0.33424	0.688309
	rs7665570	-0.397433	0.44314	0.369796
	All	-0.417034	0.276264	0.131159
Multiple sclerosis	rs10740101	-0.295801	0.0625391	2.24679e-06
	rs1509952	-0.298003	0.0625545	1.89885e-06
	rs4746746	-0.292597	0.0624357	2.781e-06
	rs6479846	-0.307107	0.0624595	8.7925e-07
	rs6479848	-0.308865	0.0624519	7.58931e-07
	rs7100320	-0.306276	0.0624181	9.25556e-07
	rs7665570	-0.346644	0.0604231	9.63984e-09
	All	-0.308281	0.0575584	8.50967e-08
Autoimmune hyperthyroidism	rs10840899	0.571824	0.31422	0.068786
	rs7100320	0.74234	0.337626	0.0278989
	rs7665570	0.662834	0.292417	0.0234057
	All	0.655503	0.255673	0.0103523
Depression	rs10840899	0.0731962	0.124754	0.55739
	rs7100320	0.0673903	0.136626	0.621839
	rs7665570	0.171436	0.0685998	0.0124517
	All	0.109328	0.0803097	0.173411
Mood disorders	rs10840899	0.0770742	0.0924332	0.404373
	rs7100320	0.104391	0.127298	0.412187
	rs7665570	0.173562	0.0662198	0.00876712
	All	0.121875	0.069371	0.0789416
Type 2 diabetes	rs10740101	-0.115951	0.0306234	0.000152868
	rs10840899	-0.118686	0.030247	8.71e-05
	rs1509952	-0.11747	0.0306234	0.00012507
	rs4746746	-0.115473	0.0305944	0.000160442
	rs6479846	-0.116037	0.0305944	0.00014898
	rs6479848	-0.116602	0.0305944	0.000138293
	rs6479860	-0.116046	0.0306234	0.000150973
	rs7100204	-0.114851	0.0305909	0.000173754
	rs7100320	-0.115414	0.0306484	0.000166056
	rs7665570	-0.120968	0.0298283	5e-05
	All	-0.116777	0.0289289	5.42e-05
Heart failure	rs10840899	-0.0955175	0.0761819	0.209912
	rs7100320	-0.0792461	0.0991868	0.424315
	rs7665570	-0.0208653	0.0701153	0.766019
	All	-0.0622001	0.061454	0.311471
S9 Table. Traits related to SNPs associating with regular glucosamine use
Variant	Position	Eff. Allele	Trait	Beta	p-value	MAF	HWE	imp. score	ORbeta*
rs10740101	64746142	G	Platelet crit	0.00052471	4.7319e-09	0.226636	0.637	0.994572	-
rs1509952	64739668	T	Platelet crit	0.000521	6e-09	0.226561	0.6544	0.995375	-
rs4746746	64699981	T	Platelet crit	0.00053317	2.5898e-09	0.226339	0.6092	0.997378	-
rs6479846	64655471	C	Platelet crit	0.0005557	4.7491e-10	0.227484	0.8235	0.999394	-
rs6479846	64655471	C	Platelet count	0.5864	4.8958e-08	0.227484	0.8235	0.999394	-
rs6479848	64659101	C	Platelet crit	0.00055728	4.2581e-10	0.227461	0.8424	0.999268	-
rs6479848	64659101	C	Platelet count	0.58848	4.4039e-08	0.227461	0.8424	0.999268	-
rs6479860	64745865	T	Platelet crit	0.00052446	4.8195e-09	0.22661	0.6439	0.99464	-
rs7100204	64640543	C	Platelet crit	0.000544	1.2898e-09	0.225609	0.9223	0.996313	-
rs7100320	64640594	C	Platelet crit	0.00054009	1.714e-09	0.22543	0.965	0.996111	-
